# Supplementary material
Source: Research Square preprint supplement (doi:10.21203/rs.3.rs-10099516/v1)
Supplement: Supplementary file 1 [file 55f2d76075b6bb4ebf2422b3.docx]

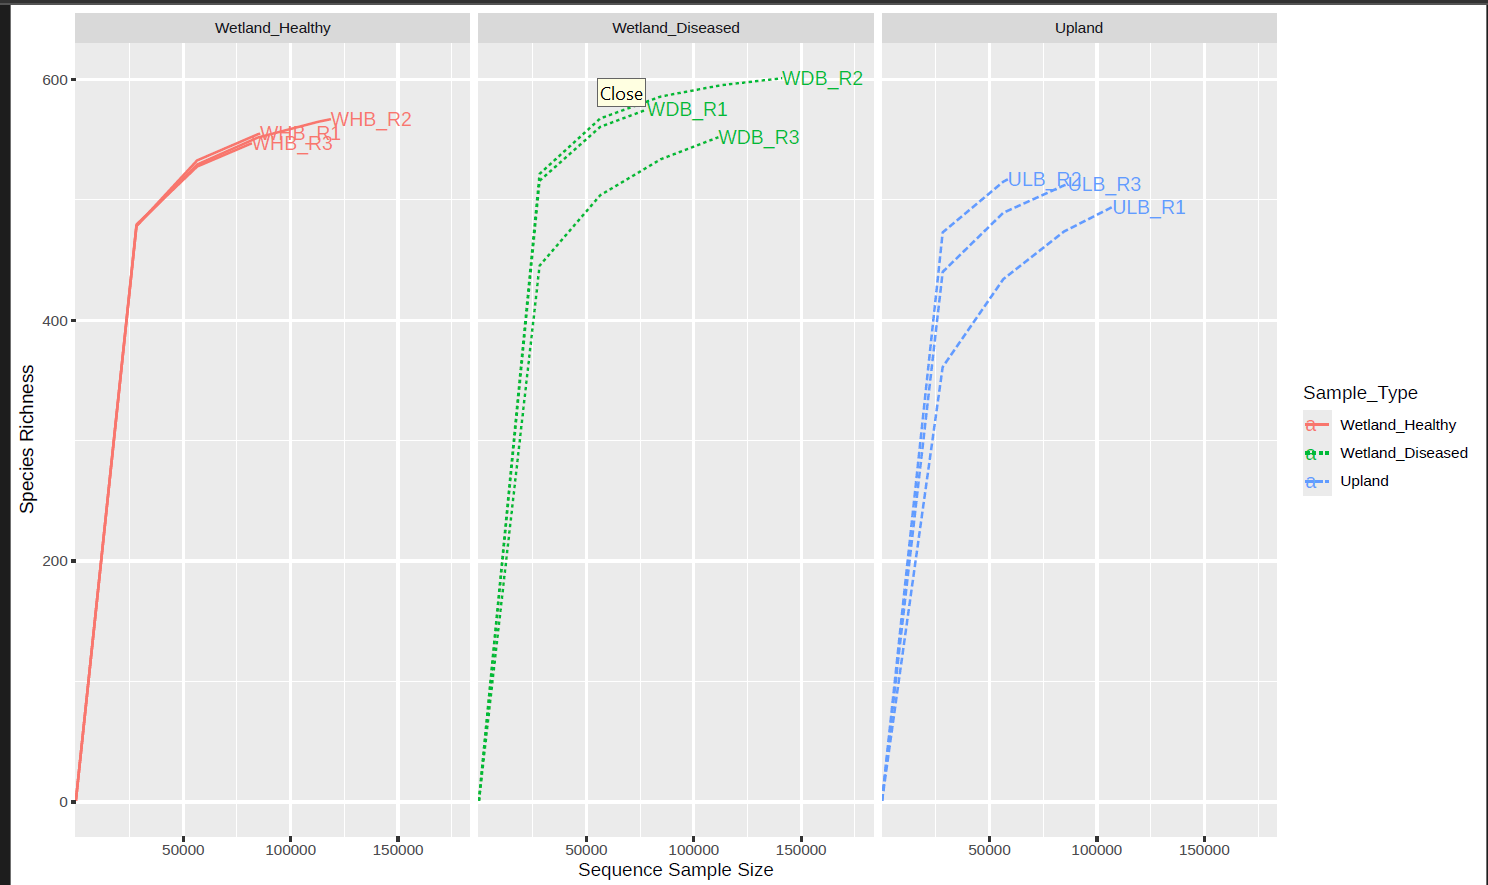


**Supplementary Fig. 1** Rarefaction curves depicting species richness as a function of sequencing depth across cassava rhizoplane microbiome samples


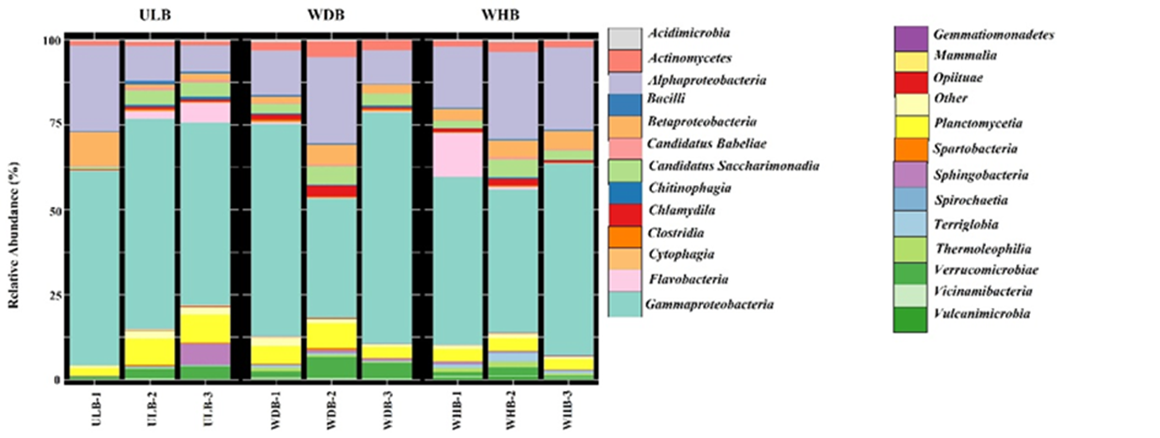


**Supplementary Fig. 2** Distribution and abundance of cassava rhizoplane microbiome at class level


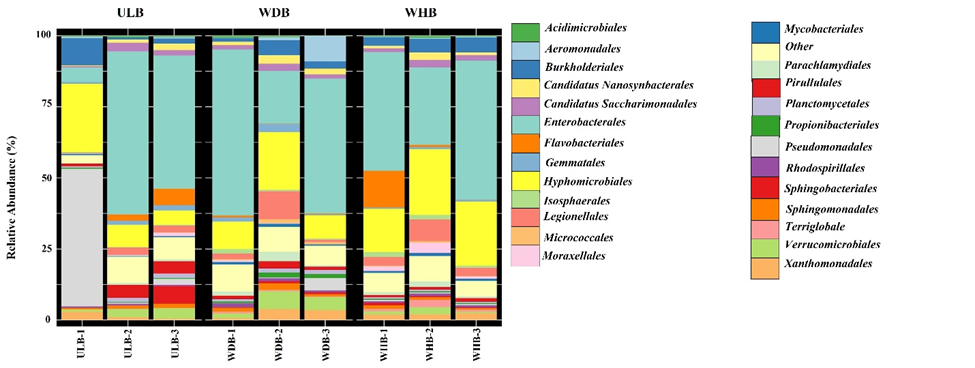


**Supplementary Fig. 3** Distribution and abundance of cassava rhizoplane microbiome at order level

**
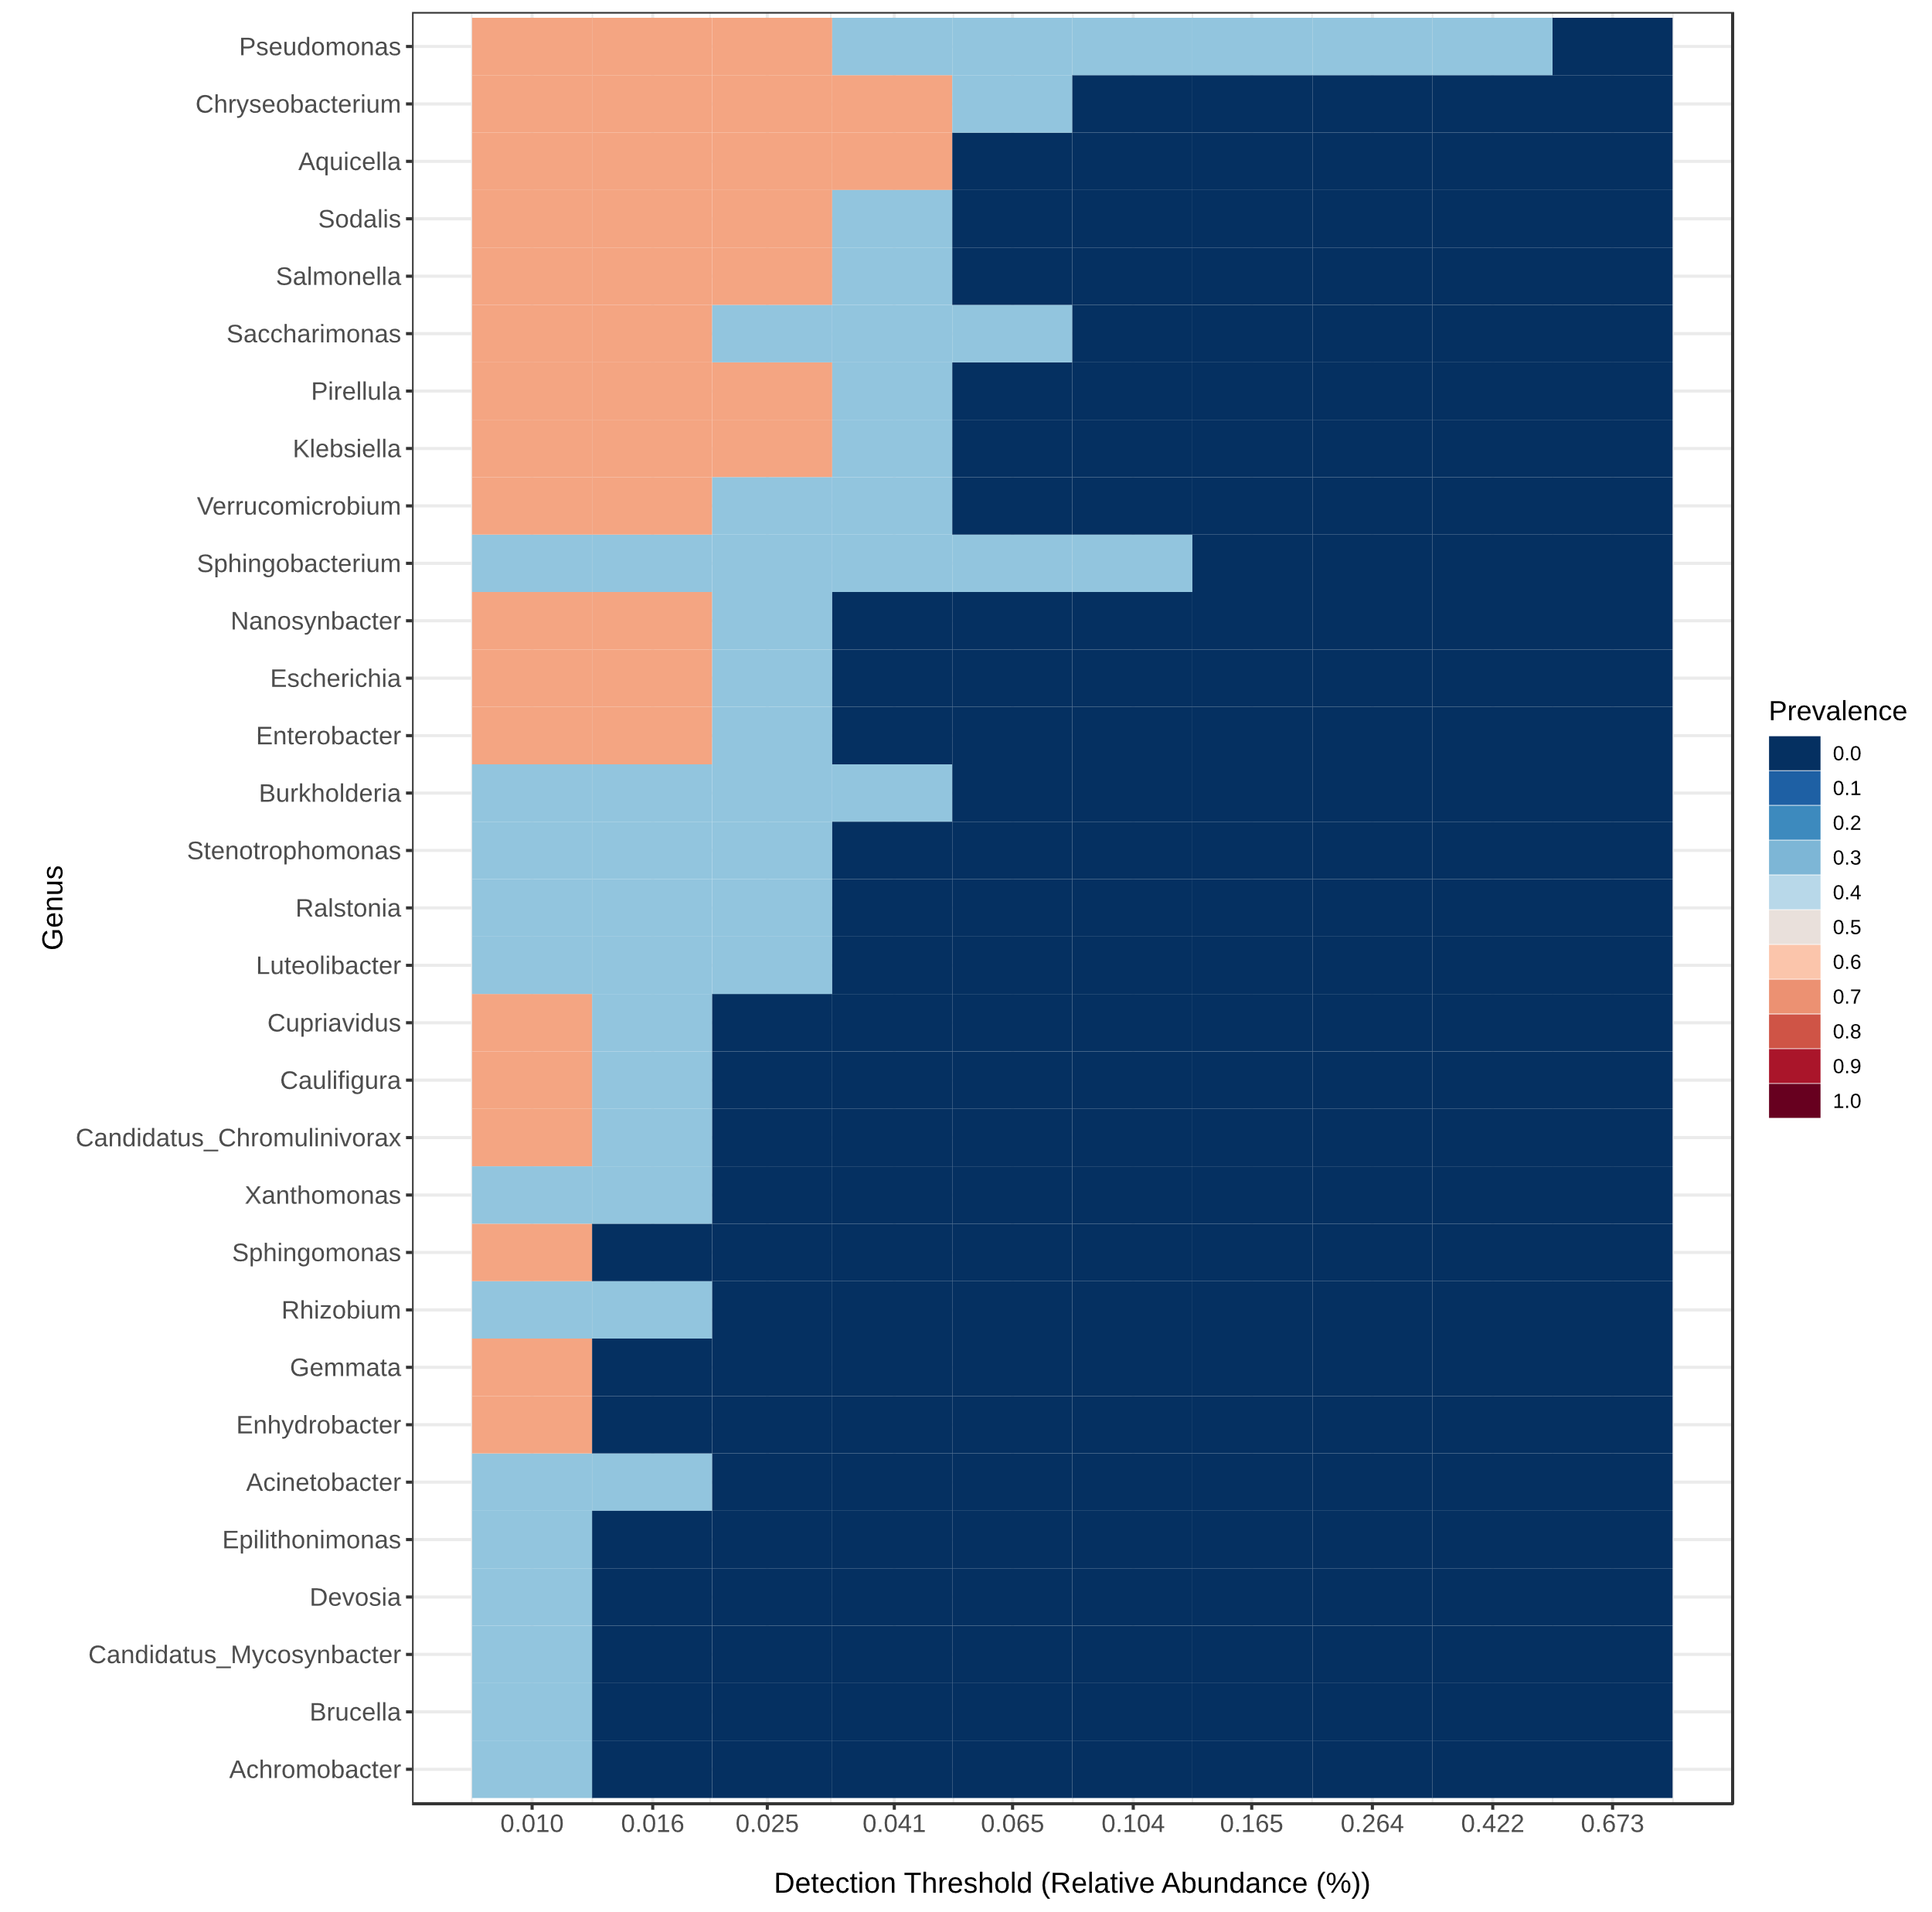
**

**Supplementary Fig. 4** Core microbiome of cassava rhizoplane representing upland eubiosis state

**
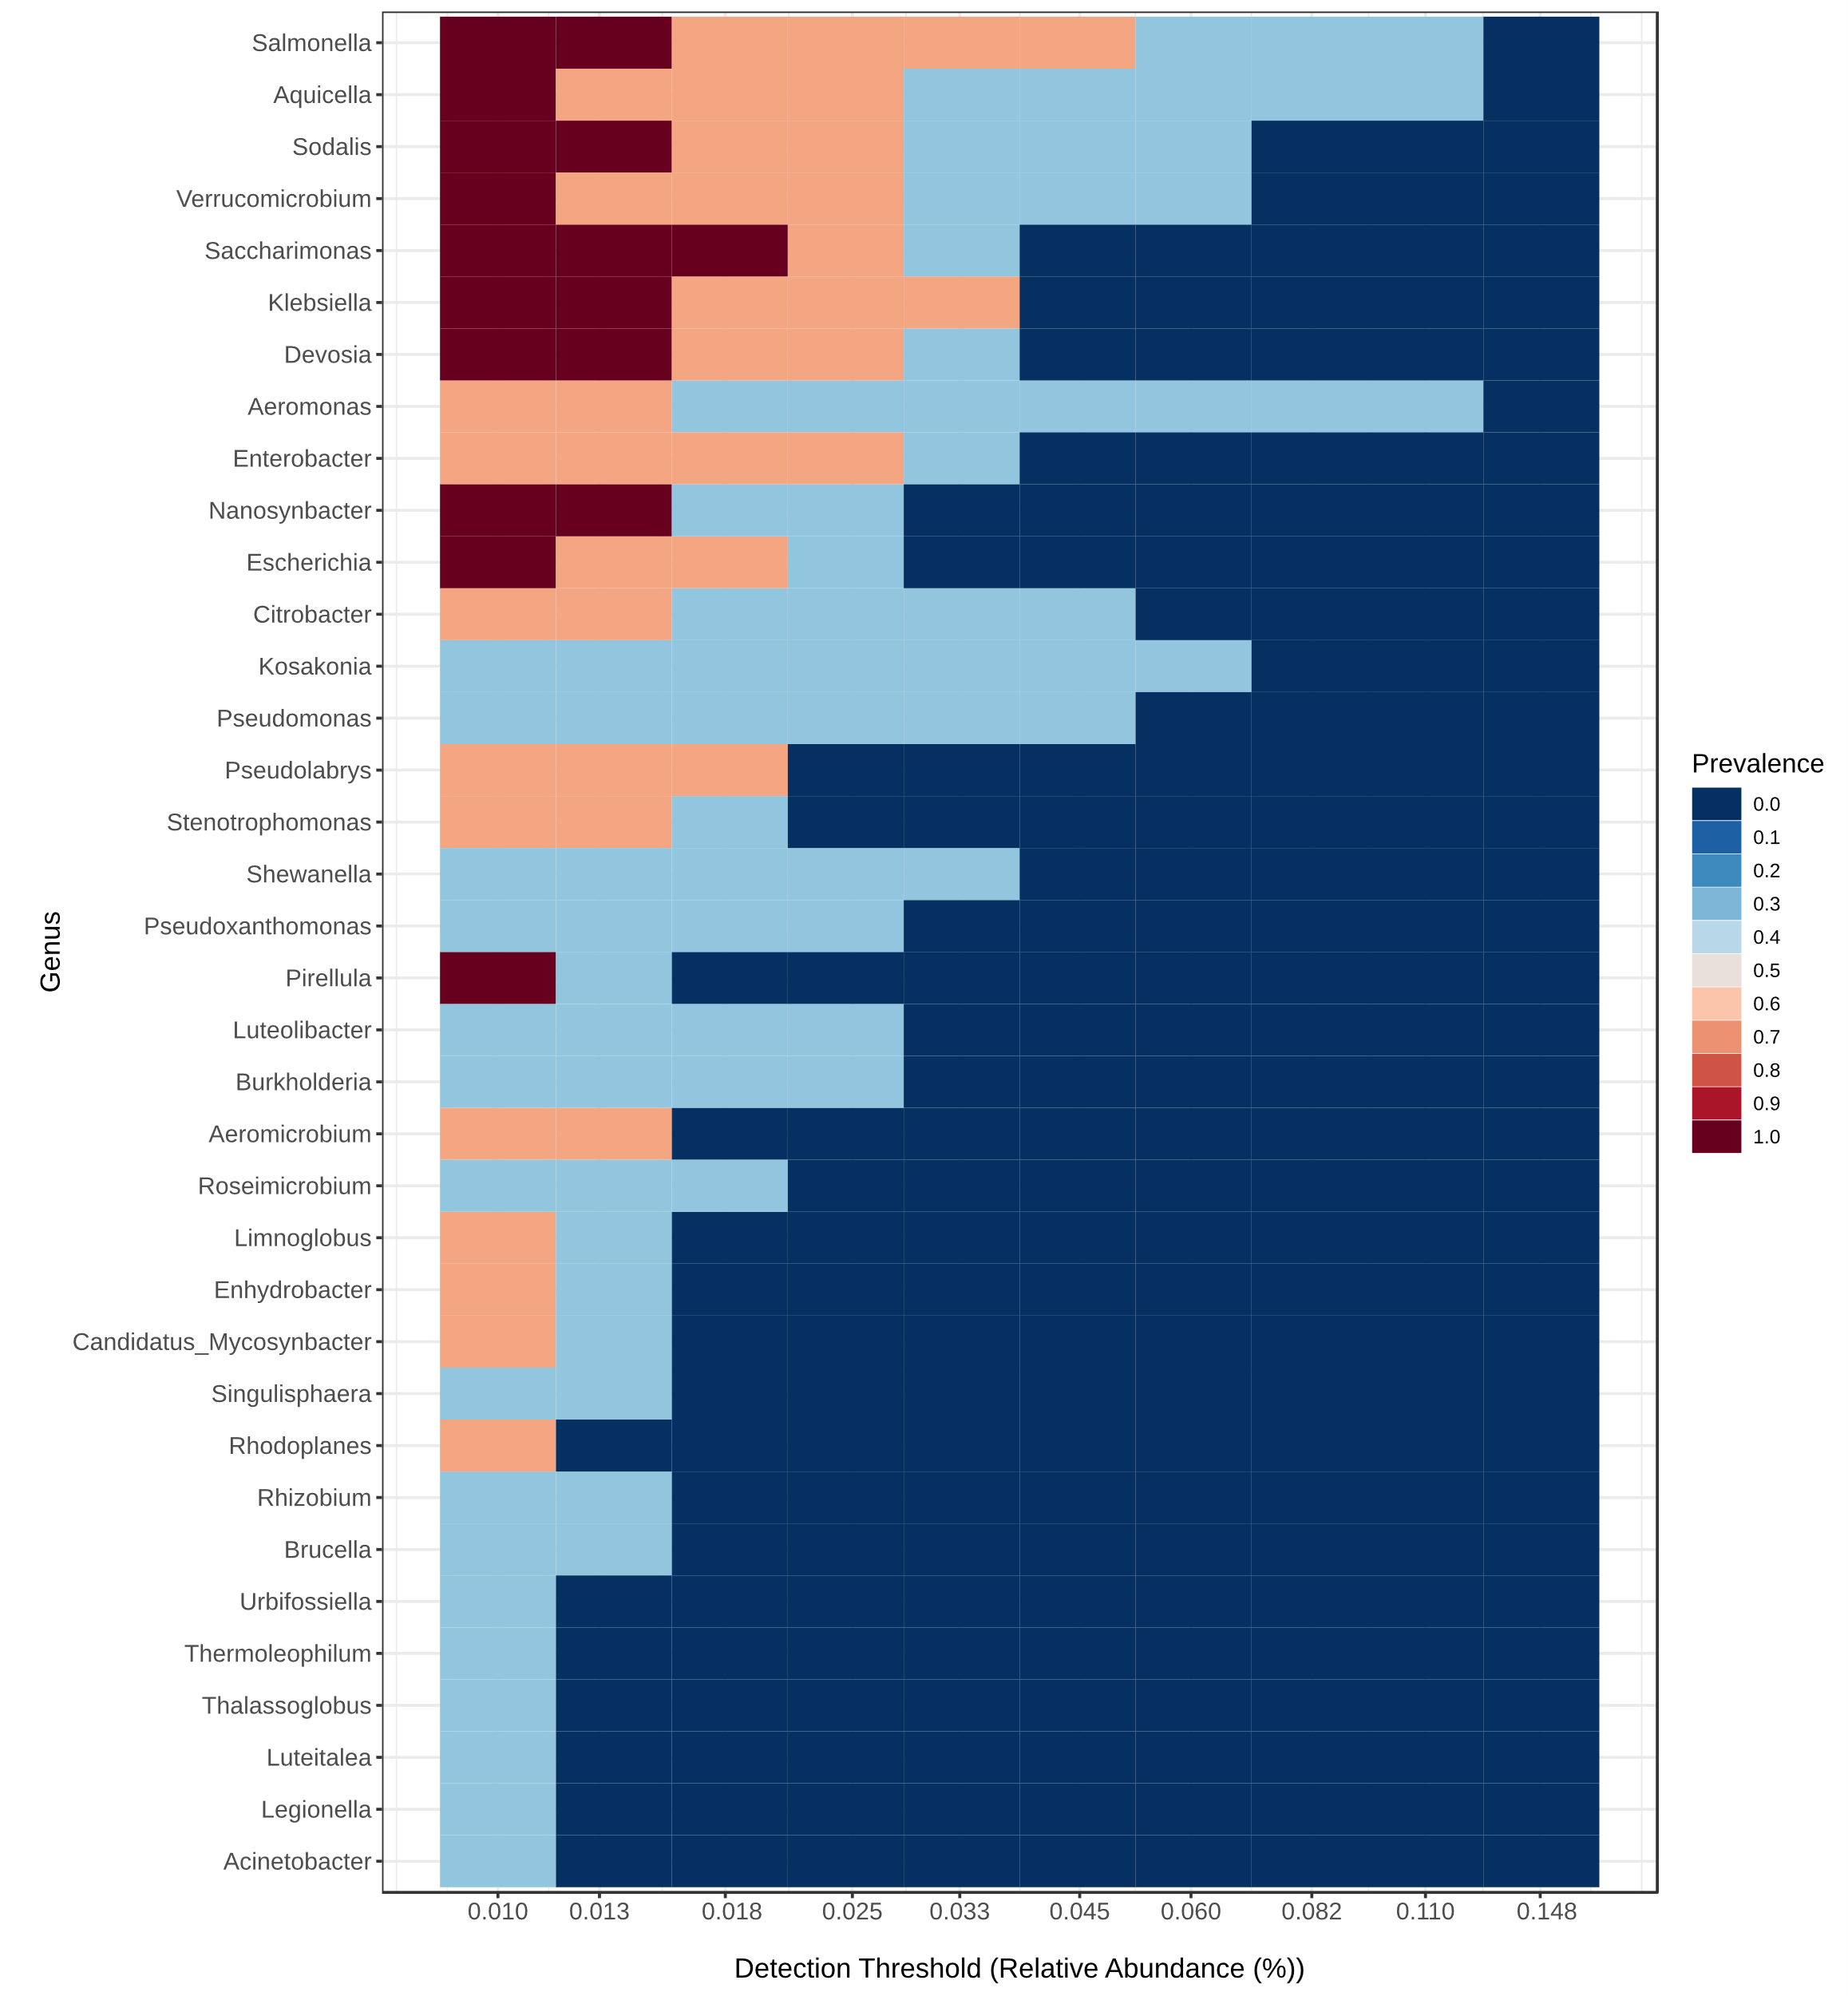
**

**Supplementary Fig. 5** Core microbiome of cassava rhizoplane representing wetland dysbiosis state

**
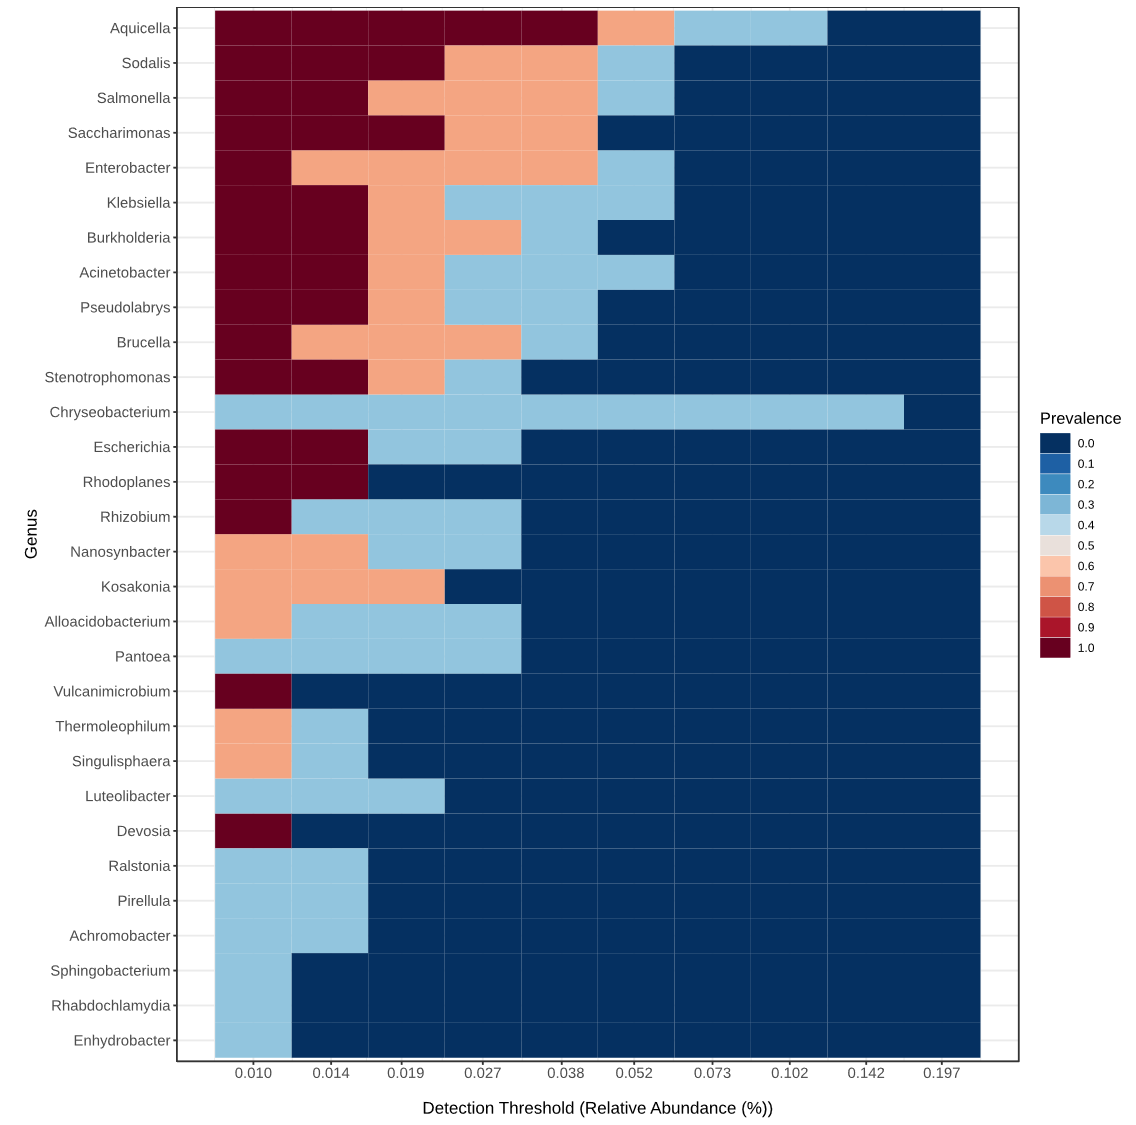
**

**Supplementary Fig. 6** Core microbiome of cassava rhizoplane representing wetland eubiosis state


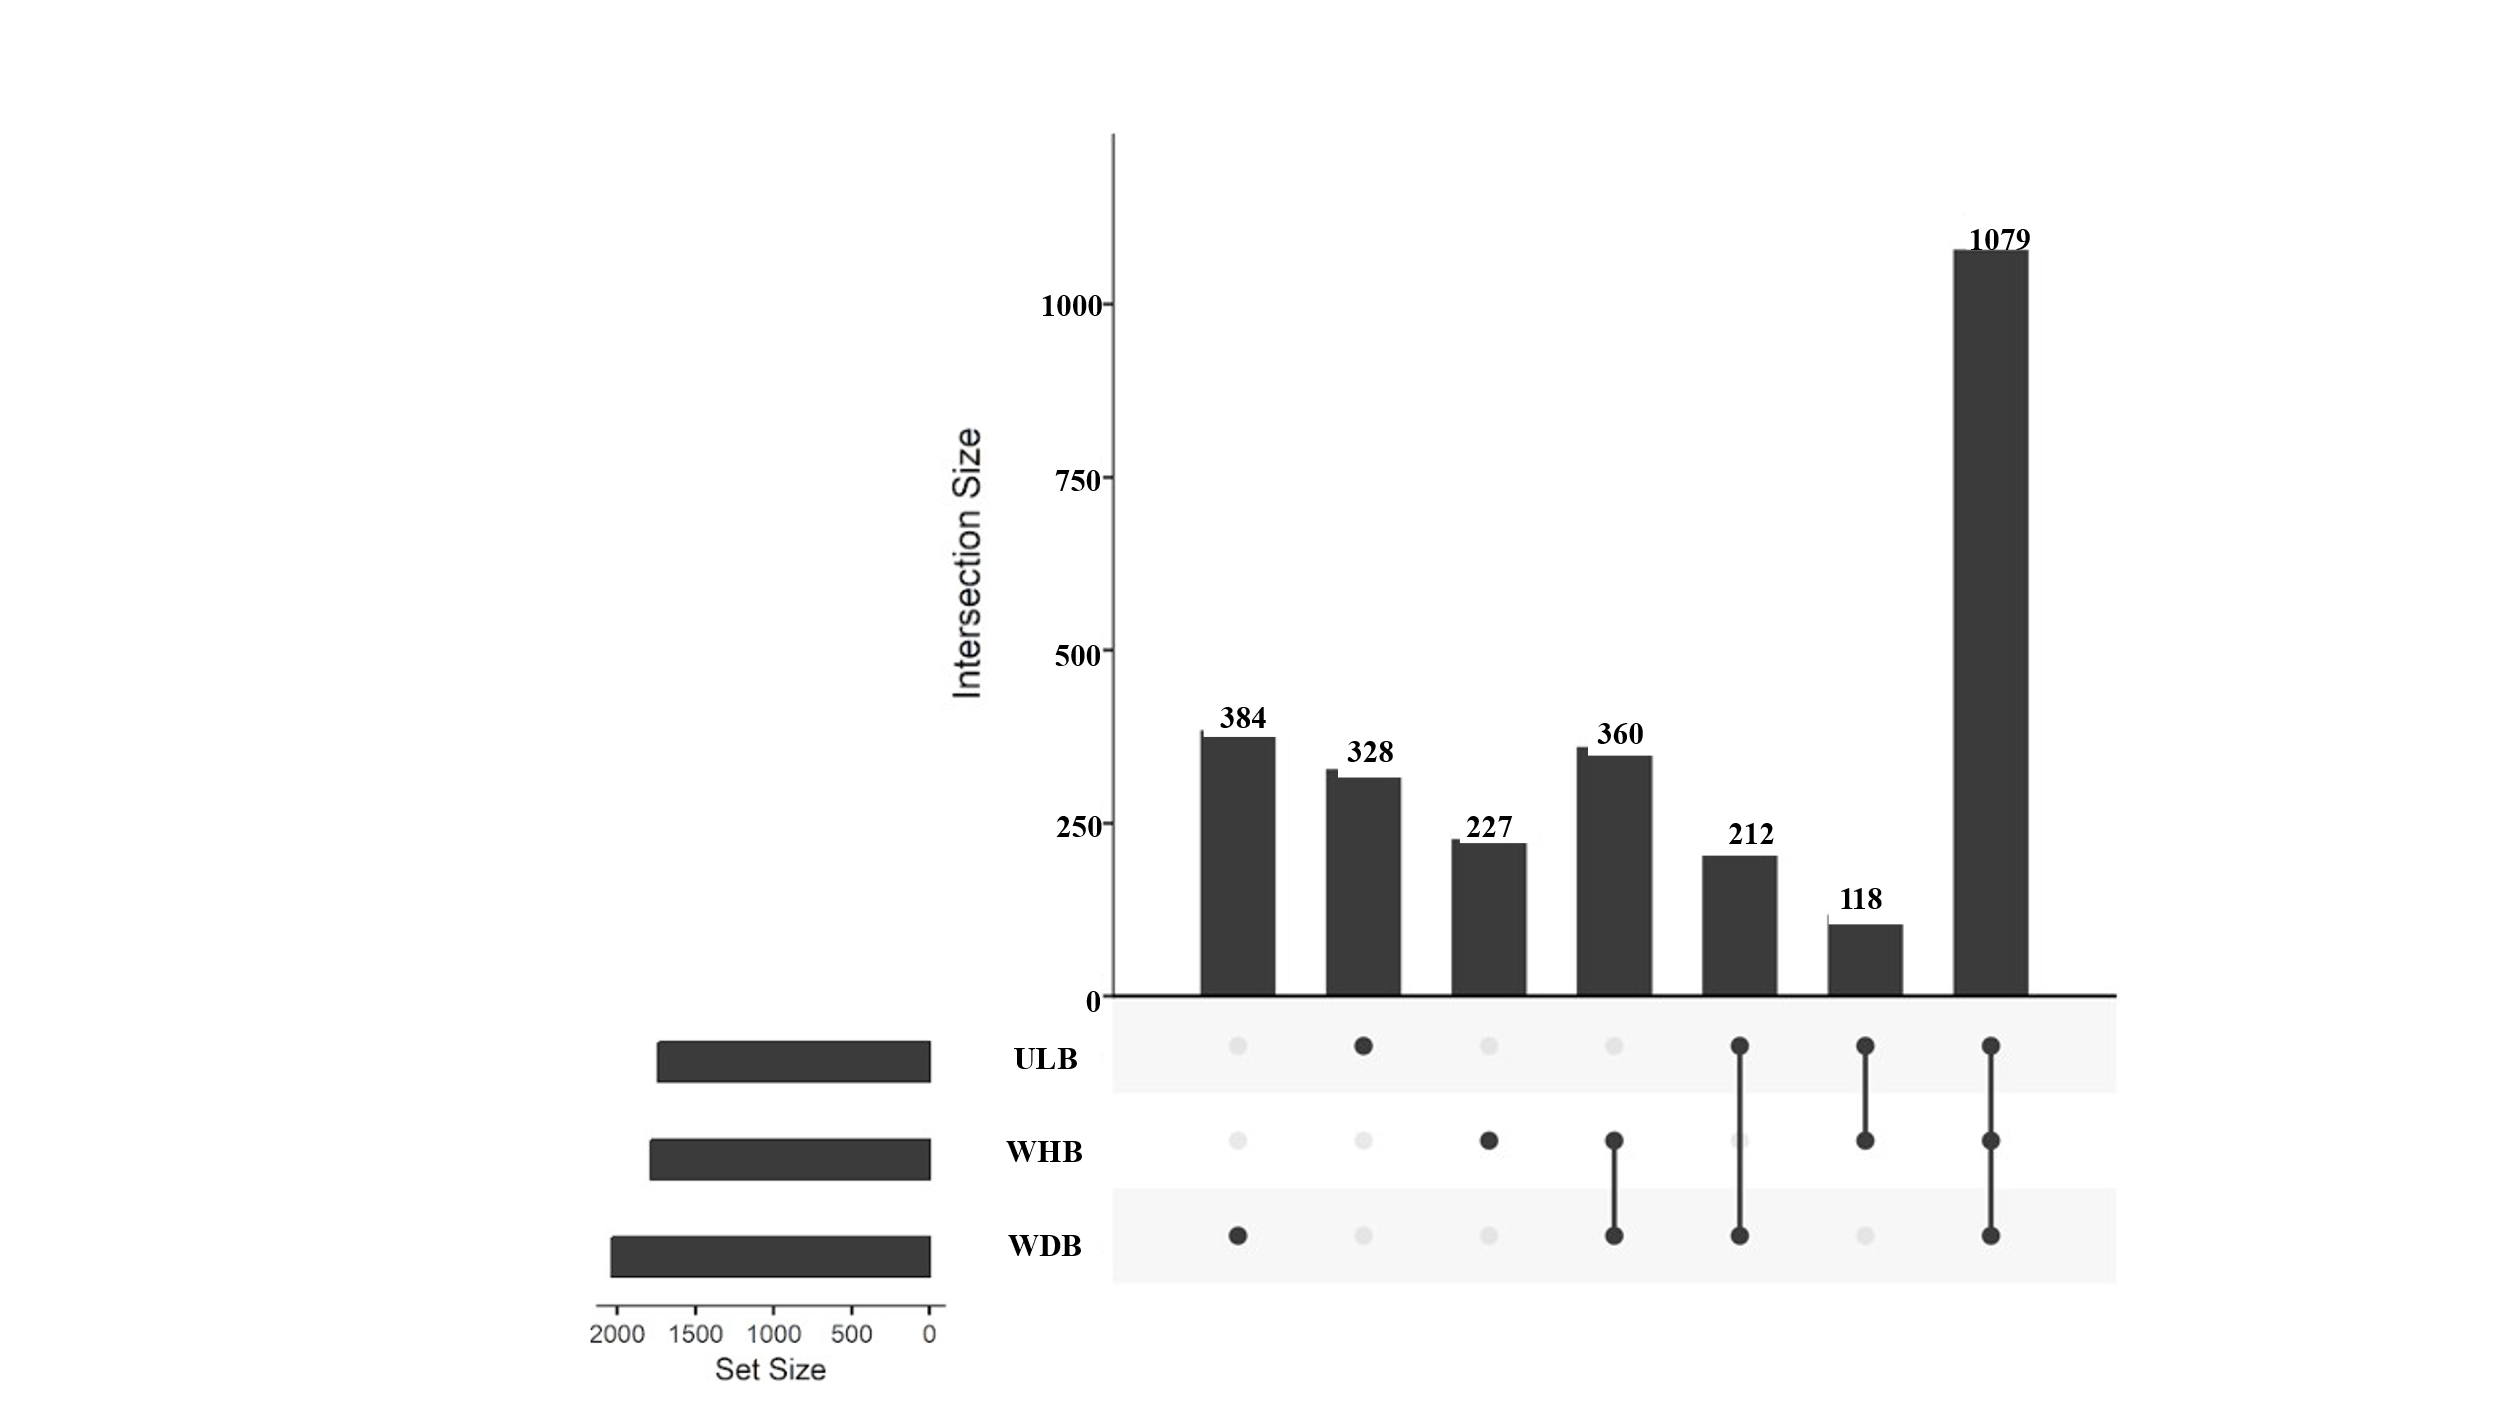


**Supplementary Fig. 7** Shared taxa of the three rhizoplane microbiome sample groups


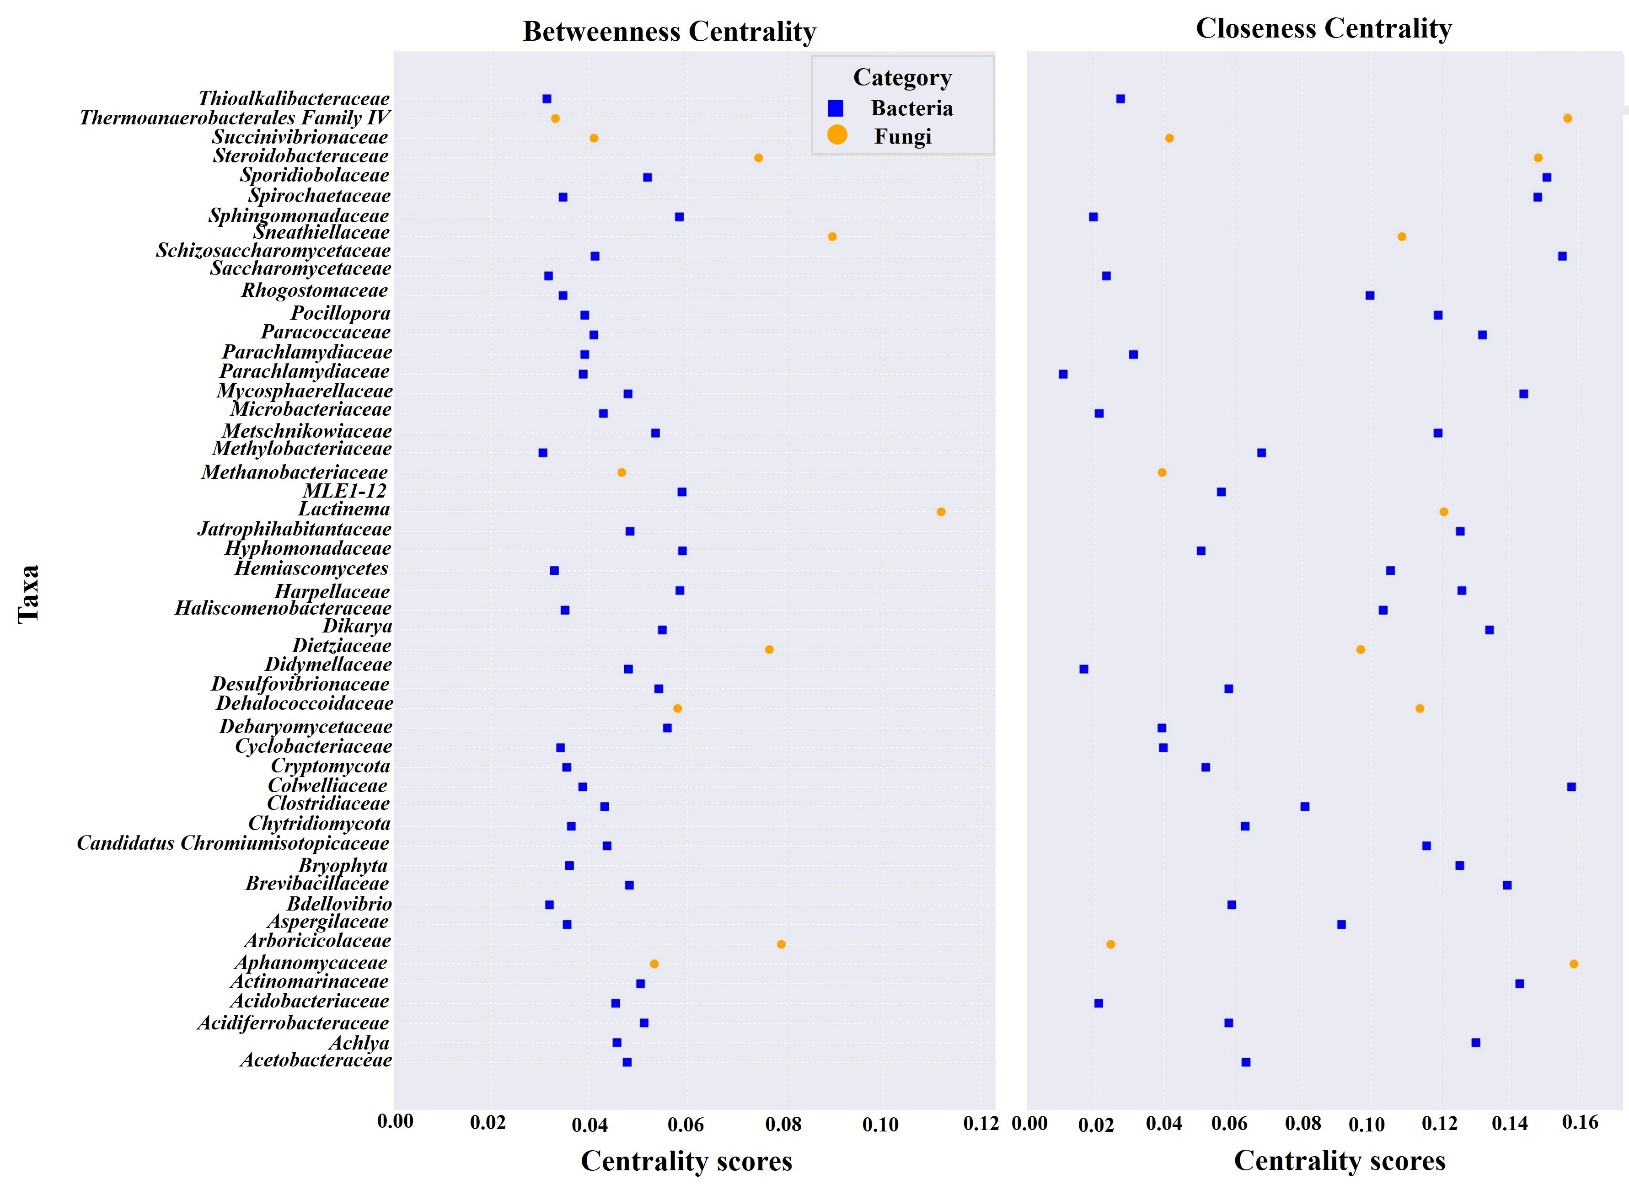


**Supplementary Fig. 8** Betweenness and closeness centrality of microbial taxa in cassava rhizoplane-associated microbiome networks

| **Rhizoplane bacterial isolate** | **Dual culture assay** | **Rhizoplane bacterial isolate** | **Dual culture assay** |
| --- | --- | --- | --- |
| ***Bacillus subtilis*ULB_36** | 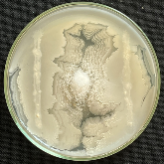 | ***Bacillus sp*.WDB_25** | 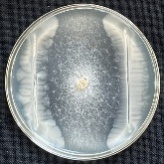 |
| ***Bacillus sp*.1ULB_12** | 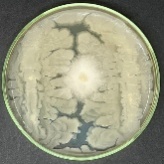 | ***Klebsiella aerogenes*3ULB_39** | 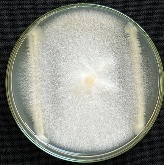 |
| ***Pseudomonas aeruginosa*ULB_13** | 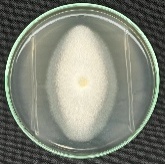 | ***Pseudomonas sp*.1ULB_33** | 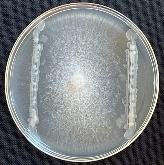 |
| ***Acinetobacter sp*.WHB_6** | 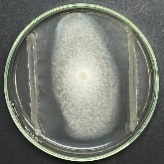 | ***Burkholderia cenocepacia*ULB_43** | 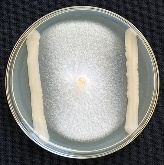 |
| ***Kosakonia sp*.7WHB_75** | 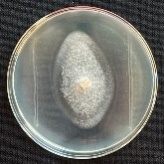 | ***Priestia sp*.1WHB_14** | 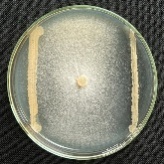 |
| ***Bacillus sp*.2ULB_25** | 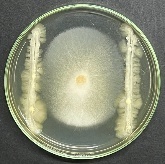 | ***Stenotrophomonas sp*.ULB_18** | 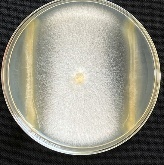 |
| ***Bacillus aerophilus*ULB_53** | 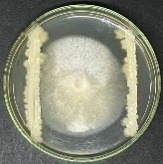 | ***Kosakonia sp*.3WDB_58** | 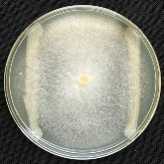 |
| ***Kosakonia sp*.1WHB_4** | 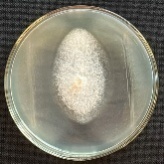 | ***Kosakonia sp*.1WDB_41** | 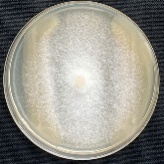 |
| ***Klebsiella pneumoniae*WHB_81** | 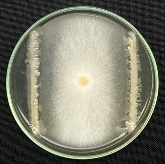 | ***Burkholderia sp*.ULB_22** | 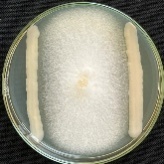 |
| ***Enterobacter sp*.2ULB_31** | 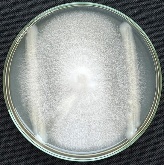 | **Control** | 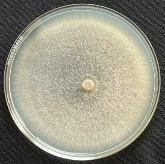 |

**Supplementary Fig. 9** Dual culture assay demonstrating the antagonistic potential of rhizoplane bacterial isolates against *Fusarium falciforme*

| **Rhizoplane bacterial isolate** | **Volatile-mediated assay** | | **Isolate** | **Volatile-mediated assay** | |
| --- | --- | --- | --- | --- | --- |
| Bacterial isolate | Volatile-exposed pathogen |  | Bacterial isolate | Volatile-exposed pathogen |
| ***Niallia circulans*ULB_7** | 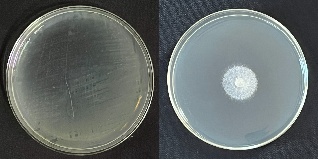 | | ***Kosakonia* *sp*.1WHB_4** | 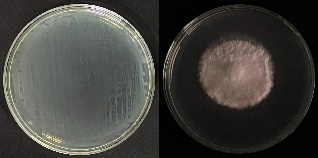 | |
| ***Klebsiella pneumoniae*WHB_81** | 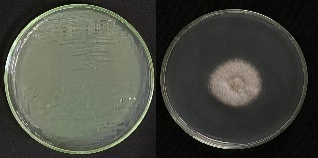 | | ***Stenotrophomonas* *sp*.2WHB_8** | 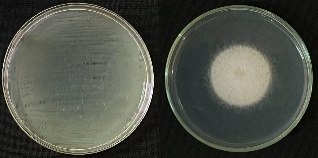 | |
| ***Pseudomonas knackmussii*WDB_84** | 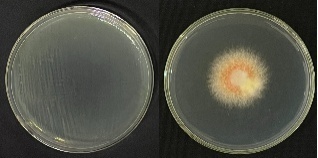 | | ***Cytobacillus oceanisediminis*3WHB_35** | 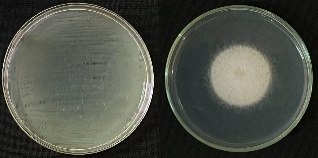 | |
| ***Pseudomonas sp*.1WHB_83** | 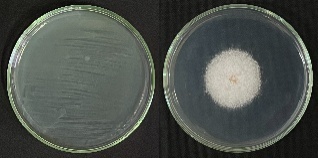 | | ***Stutzerimonas stutzeri*WDB_11** | 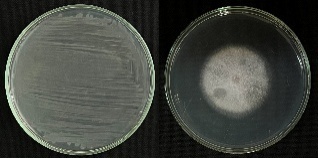 | |
| ***Bacillus infantis*WDB_4** | 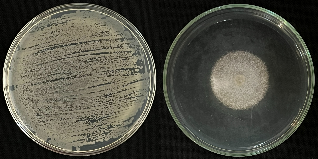 | | ***Bacillus sp.*2ULB_25** | 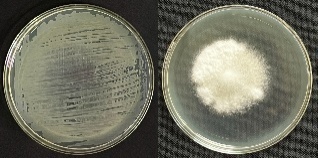 | |
| ***Pseudomonas sp*.1ULB_33** | 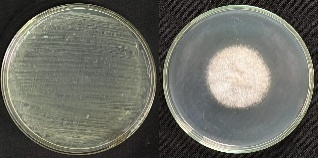 | | ***Pseudomonas aeruginosa*ULB_13** | 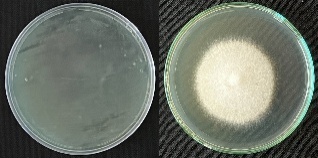 | |
| ***Pseudomonas alloputida*WHB_65** | 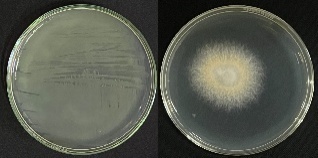 | | ***Cytobacillus kochii*WDB_12** | 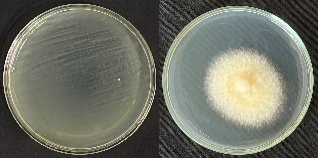 | |
| ***Stenotrophomonas sp*.1WHB_2** | 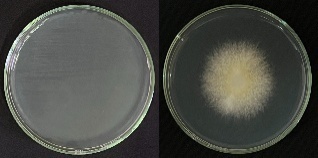 | | ***Priestia aryabhattai*ULB_17** | 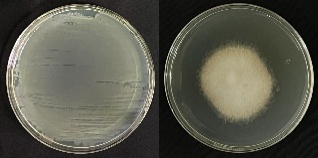 | |
| ***Bacillus subtilis*ULB_36** | 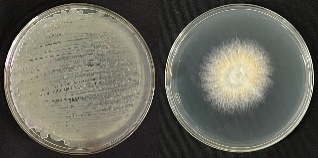 | | ***Pantoea dispersa*2WHB_67** | 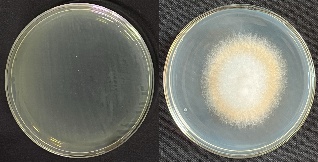 | |
| ***Pantoea dispersa*1WHB_55** | 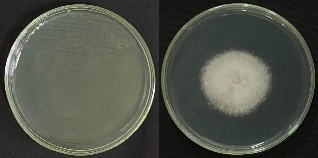 | | **Negative control** | ***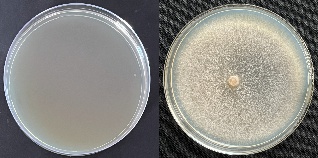*** | |

**Supplementary Fig. 10** Rhizoplane bacterial volatile-mediated suppression of *Fusarium falciforme*
