# Supplementary material
Source: Research Square preprint supplement (doi:10.21203/rs.3.rs-10099516/v1)
Supplement: Supplementary file 3 [file c71d9754f6eb1c3992b27417.docx]

**Supplementary Table 1.** Sequencing summary and alpha-diversity metrics of cassava rhizoplane bacterial communities revealed by bacterial metabarcoding across upland and wetland habitats

| **Metric** | **ULB (Upland)** | **WDB (Wetland Diseased)** | **WHB (Wetland Healthy)** |
| --- | --- | --- | --- |
| **Sequences** | 4,37,469 | 5,51,637 | 5,08,392 |
| **Reads** | 8,69,602 | 10,96,826 | 10,10,992 |
| **GC (%)** | 54.67 | 54.83 | 54.67 |
| **Observed richness** | 508± 12.29 | 576± 24.52 | 556.33± 10.07 |
| **Chao1** | 547.97± 5.74 | 601.60± 10.37 | 581.20± 14.39 |
| **ACE** | 545.29± 6.12 | 598.30± 9.32 | 575.89± 9.57 |
| **Shannon** | 3.51± 1.33 | 4.35± 0.31 | 4.20± 0.17 |
| **Simpson** | 0.83 ± 0.25 | 0.97± 0.01 | 0.96± 0.02 |
| **Fisher** | 72.48 ± 5.57 | 80.08± 4.24 | 78.49± 1.11 |

Alpha-diversity of cassava rhizoplane bacterial communities based on 16S metabarcoding across upland (ULB), wetland diseased (WDB), and wetland healthy (WHB) habitats. Values are presented as Mean ± Standard Deviation (SD). Metrics include sequencing depth, GC content, diversity indices (Shannon, Simpson, Fisher’s alpha), and richness estimators (Observed richness, Chao1, and ACE) with standard deviation.

**Supplementary Table 2.** Secreted metabolome mediated antifungal activity of rhizoplane bacterial isolates recovered from *Fusarium* root rot-endemic and non-endemic cassava agroecosystems

| **Upland** | | | |
| --- | --- | --- | --- |
| **Isolate** | **PI** | **Isolate** | **PI** |
| *Rhizobium dioscoreae*1ULB_45 | 48.15 ± 1.28f | *Citrobacter freundii*ULB_58 | 21.11 ± 1.11qr |
| *Neobacillus drentensis*ULB_14 | 45.56 ± 1.92g | *Klebsiella aerogenes*4ULB_54 | 20.74 ± 2.57qr |
| *Chitinophaga sp*.ULB_65 | 44.81 ± 0.64gh | *Pseudomonas sp*.2ULB_66 | 19.63 ± 1.70r |
| *Enterobacter sp*.4ULB_52 | 44.44 ± 0.00gh | *Staphylococcus warneri*ULB_21 | 19.26 ± 2.80r |
| *Rhizobium dioscoreae*2ULB_64 | 42.59 ± 1.70hi | *Pseudomonas nicosulfuronedens*ULB_8 | 15.93 ± 0.64s |
| *Priestia aryabhattai*ULB_17 | 41.11 ± 1.11ij | *Citrobacter werkmanii*ULB_10 | 14.44 ± 2.22st |
| *Klebsiella sp*.3ULB_35 | 40.00 ± 2.22jk | *Variovorax guangxiensis*1ULB_46 | 13.70 ± 0.64st |
| *Enterobacter sp*.1ULB_4 | 39.26 ± 1.70jkl | *Cytobacillus firmus*ULB_2 | 12.22 ± 1.11tu |
| *Enterobacter sp*.3ULB_41 | 38.89 ± 0.00jkl | *Variovorax guangxiensis*3ULB_62 | 12.22 ± 1.11tu |
| *Enterobacter cloacae*1ULB_16 | 37.78 ± 1.11klm | *Bacillaceae* bacteriumULB_3 | 11.11 ± 0.00uv |
| *Klebsiella aerogenes*2ULB_37 | 37.41 ± 1.70lm | *Cupriavidus sp*.ULB_19 | 11.11 ± 0.00uv |
| *Klebsiella sp.*1ULB_30 | 37.41 ± 1.70lm | *Klebsiella sp*.2ULB_34 | 11.11 ± 0.00uv |
| *Enterobacter cloacae*3ULB_40 | 37.04 ± 1.28lmn | *Niallia circulans*ULB_7 | 11.11 ± 0.00uv |
| *Cytobacillus kochii*ULB_9 | 35.56 ± 1.92mno | *Ralstonia soli*ULB_44 | 11.11 ± 0.00uv |
| *Enterobacter sp*.5ULB_55 | 35.56 ± 2.22mno | *Sutcliffiella sp*.ULB_1 | 11.11 ± 0.00uv |
| *Klebsiella aerogenes*1ULB_11 | 34.81 ± 1.28no | *Variovorax guangxiensis*2ULB_47 | 10.74 ± 1.70uv |
| *Lysinibacillus sp*.ULB_48 | 34.81 ± 0.64no | *Staphylococcus saprophyticus*ULB_26 | 10.37 ± 0.64uvw |
| *Kluyvera cryocrescens*ULB_57 | 33.70 ± 1.28o | *Salmonella sp*.ULB_29 | 10.00 ± 1.92uvw |
| *Kluyvera sp*.ULB_6 | 27.78 ± 1.11p | *Staphylococcus arlettae*ULB_24 | 10.00 ± 1.11uvw |
| *Enterobacter pseudoroggenkampii*ULB_61 | 26.67 ± 1.11p | *Ensifer sp*.ULB_27 | 9.63 ± 1.28vw |
| *Staphylococcus hominis*ULB_15 | 22.59 ± 2.80q | *Kytococcus sedentarius*ULB_23 | 8.15 ± 1.70w |
| **Wetland diseased** | | | |
| *Kosakonia pseudosacchari*5WDB_82 | 48.89 ± 1.11c | *Kluyvera georgiana*WDB_54 | 28.89 ± 1.92p |
| *Phytobacter diazotrophicus*2WDB_38 | 46.67 ± 2.94d | *Klebsiella aerogenes*1WDB_5 | 22.59 ± 3.57q |
| *Klebsiella sp*.WDB_83 | 45.19 ± 0.64de | *Chryseobacterium sp*.2WDB_70 | 19.63 ± 2.31r |
| *Kluyvera sp*.1WDB_63 | 44.81 ± 0.64def | *Enterobacter hormaechei*1WDB_1 | 19.63 ± 3.39r |
| *Aeromonas media*WDB_36 | 44.44 ± 0.00ef | *Enterobacter sp*.7WDB_46 | 19.63 ± 0.64r |
| *Klebsiella quasivariicola*3WDB_76 | 44.44 ± 0.00ef | *Klebsiella aerogenes*4WDB_37 | 19.63 ± 1.28r |
| *Kosakonia oryzendophytica*3WDB_66 | 44.44 ± 0.00ef | *Enterobacter sp*.6WDB_43 | 18.15 ± 1.70r |
| *Kosakonia pseudosacchari*2WDB_60 | 44.44 ± 0.00ef | *Enterobacter chengduensis*1WDB_7 | 17.78 ± 2.22r |
| *Pseudomonas knackmussii*WDB_84 | 44.44 ± 0.00ef | *Aeromonas sp*.2WDB_34 | 11.11 ± 0.00s |
| *Kosakonia oryzendophytica*1WDB_55 | 44.07 ± 0.64efg | *Enterobacter sp*.1WDB_3 | 11.11 ± 1.11kl |
| *Kosakonia oryzendophytica*2WDB_62 | 44.07 ± 0.64efg | *Bacillus infantis*WDB_4 | 10.00 ± 1.11st |
| *Kosakonia pseudosacchari*1WDB_57 | 44.07 ± 0.64efg | *Klebsiella aerogenes*2WDB_10 | 10.00 ± 1.11st |
| *Kosakonia pseudosacchari*3WDB_61 | 44.07 ± 0.64efg | *Chryseobacterium sp*.3WDB_73 | 8.89 ± 1.11tu |
| *Kosakonia oryzendophytica*4WDB_77 | 43.70 ± 1.28efg | *Kluyvera sp*.2WDB_81 | 7.78 ± 1.11uv |
| *Enterobacter cloacae*WDB_56 | 43.33 ± 0.00efgh | *Enterobacter hormaechei*3WDB_26 | 7.04 ± 1.70uvw |
| *Enterobacter sp*. 12WDB_68 | 43.33 ± 0.00efgh | *Pseudomonas oleovorans*WDB_71 | 5.93 ± 1.28vwx |
| *Pantoea dispersa*WDB_79 | 43.33 ± 1.11efgh | *Acinetobacter pittii*WDB_13 | 5.56 ± 1.11wx |
| *Enterobacter sp*.8WDB_59 | 42.96 ± 0.64fgh | *Chryseobacterium sp*.1WDB_69 | 5.56 ± 0.00wx |
| *Klebsiella quasivariicola*2WDB_74 | 42.22 ± 1.11ghi | *Enterobacter soli*4WDB_80 | 5.56 ± 2.22wx |
| *Kosakonia sp*.2WDB_47 | 42.22 ± 0.00ghi | *Cytobacillus kochii*WDB_12 | 5.19 ± 0.64wx |
| *Enterobacter sp*.9WDB_64 | 41.48 ± 2.80hij | *Stutzerimonas stutzeri*WDB_11 | 5.19 ± 1.70wx |
| *Aeromonas hydrophila*WDB_72 | 40.74 ± 1.70ijk | *Acinetobacter sp*.WDB_75 | 4.07 ± 2.80xy |
| *Enterobacter soli*1WDB_33 | 40.37 ± 0.64ijk | *Aeromonas sp*.1WDB_29 | 2.96 ± 1.70yz |
| *Enterobacter sp*.11WDB_67 | 40.00 ± 1.11jkl | *Enterobacter sp*.3WDB_24 | 1.85 ± 0.64zA |
| *Enterobacter sp*.10WDB_65 | 39.26 ± 0.64s | *Acinetobacter nosocomialis*1WDB_27 | 1.48 ± 2.57zA |
| *Klebsiella variicola*1WDB_39 | 39.26 ± 0.64kl | *Enterobacter chengduensis*2WDB_21 | 1.48 ± 0.64zA |
| *Enterobacter sichuanensis*WDB_50 | 38.15 ± 0.64lm | *Enterobacter hormaechei*2WDB_16 | 0.74 ± 0.64A |
| *Phytobacter diazotrophicus*1WDB_30 | 37.04 ± 1.70mn | *Enterobacter sp*.2WDB_15 | 0.74 ± 0.64A |
| *Enterobacter sp*.4WDB_35 | 36.67 ± 1.11mn | *Citrobacter farmeri*1WDB_17 | 0.37 ± 0.64A |
| *Acinetobacter nosocomialis*2WDB_28 | 35.93 ± 0.64n | *Enterobacter kobei*WDB_23 | 0.37 ± 0.64A |
| *Enterobacter sp*.5WDB_42 | 35.93 ± 1.70n | *Citrobacter amalonaticus*WDB_44 | 0.00 ± 0.00A |
| *Klebsiella quasivariicola*1WDB_32 | 35.56 ± 0.00n | *Enterobacter soli*2WDB_45 | 0.00 ± 0.00A |
| *Klebsiella variicola*2WDB_52 | 35.19 ± 0.64no | *Enterobacter soli*3WDB_48 | 0.00 ± 0.00A |
| *Citrobacter farmeri*2WDB_49 | 33.33 ± 1.11o | *Klebsiella aerogenes*3WDB_18 | 0.00 ± 0.00A |
| *Citrobacter sp*.WDB_2 | 29.63 ± 0.64p |  |  |
| **Wetland healthy** | | | |
| *Klebsiella sp*.4WHB_59 | 47.04 ± 2.57d | *Enterobacter sp*.4WHB_23 | 25.19 ± 2.80s |
| *Niallia sp*.3WHB_79 | 46.67 ± 1.92de | *Enterobacter huaxiensis*1WHB_28 | 21.48 ± 1.28t |
| *Kosakonia sp*.3WHB_30 | 45.93 ± 0.64de | *Klebsiella aerogenes*WHB_32 | 21.11 ± 1.92tu |
| *Pantoea dispersa*2WHB_67 | 44.81 ± 0.64def | *Enterobacter sp.*9WHB_49 | 18.89 ± 1.11uv |
| *Pseudomonas wayambapalatensis*WHB_82 | 44.44 ± 0.00efg | *Leclercia tamurae*WHB_36 | 18.89 ± 1.11uv |
| *Stenotrophomonas maltophilia*WHB_8 | 44.44 ± 0.00efg | *Epilithonimonas arachidiradicis*WHB_34 | 18.52 ± 1.28v |
| *Kosakonia sp*.6WHB_50 | 43.33 ± 1.92fgh | *Kluyvera sp*.1WHB_22 | 18.52 ± 1.70v |
| *Kosakonia sp*.4WHB_33 | 42.22 ± 0.00ghi | *Cytobacillus oceanisediminis*3WHB_35 | 15.93 ± 1.28w |
| *Kosakonia sp*.5WHB_44 | 42.22 ± 0.00ghi | *Citrobacter sp*.WHB_24 | 14.81 ± 1.28wx |
| *Enterobacter sp*.16WHB_69 | 41.85 ± 2.80hij | *Enterobacter huaxiensis*3WHB_46 | 14.44 ± 0.00wx |
| *Enterobacter sp*.13WHB_60 | 41.48 ± 1.70hijk | *Enterobacter sp*.6WHB_40 | 13.33 ± 2.94xy |
| *Enterobacter sp*.11WHB_54 | 41.11 ± 1.11hijkl | *Enterobacter sp*.8WHB_48 | 12.96 ± 1.70xyz |
| *Klebsiella sp*.7WHB_72 | 41.11 ± 1.11hijkl | *Kluyvera sp*.2WHB_27 | 12.96 ± 1.70xyz |
| *Kluyvera sp*.3WHB_47 | 41.11 ± 1.11hijkl | *Kluyvera georgiana*WHB_43 | 11.48 ± 0.64yzA |
| *Enterobacter sp*.12WHB_56 | 40.37 ± 2.57ijklm | *Enterobacter sp*.2WHB_7 | 11.11 ± 1.11yzAB |
| *Enterobacter sp*.14WHB_61 | 40.00 ± 0.00ijklmn | *Novosphingobium panipatense*WHB_38 | 10.74 ± 1.70zABC |
| *Enterobacter sp*.17WHB_71 | 40.00 ± 1.11ijklmn | *Acinetobacter pittii*WHB_26 | 9.63 ± 1.28ABCD |
| *Klebsiella sp*.6WHB_66 | 40.00 ± 1.11ijklmn | *Niallia sp*.2WHB_20 | 9.63 ± 0.64ABCD |
| *Pantoea dispersa*1WHB_55 | 40.00 ± 2.22ijklmn | *Pseudomonas sp*.1WHB_83 | 9.26 ± 2.31ABCD |
| *Enterobacter sp*.5WHB_31 | 39.63 ± 1.28jklmno | *Pseudomonas kurunegalensis*WHB_39 | 8.89 ± 0.00BCD |
| *Enterobacter sp*.7WHB_41 | 39.26 ± 2.80klmno | *Pseudomonas sp*.2WHB_85 | 8.89 ± 1.11BCD |
| *Enterobacter sp*.10WHB_53 | 38.89 ± 1.11G | *Cytobacillus oceanisediminis*2WHB_9 | 8.52 ± 2.80CD |
| *Enterobacter huaxiensis*2WHB_42 | 38.52 ± 1.28mnop | *Leclercia sp*.WHB_29 | 8.15 ± 0.64DE |
| *Kosakonia sp*.2WHB_25 | 37.78 ± 2.22nopq | *Pseudomonas alloputida*WHB_65 | 7.78 ± 1.11DEF |
| *Enterobacter sp*.18WHB_74 | 37.41 ± 1.70opq | *Enterobacter sp*.3WHB_10 | 5.93 ± 0.64EF |
| *Enterobacter sp*.15WHB_68 | 36.30 ± 2.80pq | *Niallia sp*.1WHB_12 | 5.93 ± 1.70EF |
| *Klebsiella sp*.1WHB_15 | 35.56 ± 2.22q | *Falsibacillus sp*.WHB_17 | 5.56 ± 0.00F |
| *Kosakonia pseudosacchari*WHB_45 | 35.56 ± 1.11q | *Cytobacillus oceanisediminis*1WHB_3 | 2.22 ± 0.00G |
| *Priestia sp*.2WHB_16 | 35.56 ± 2.22q | *Enterobacter sp*.1WHB_1 | 2.22 ± 0.00lmno |
| *Klebsiella sp*.2WHB_18 | 32.59 ± 1.28r | *Stenotrophomonas sp*.1WHB_2 | 2.22 ± 0.00G |

Values represent percent inhibition (PI, mean ± SD; n = 3). Different lowercase letters within each habitat indicate significant differences among isolates according to ANOVA

**Supplementary Table 3.** Volatile inhibition mediated antifungal activity of rhizoplane bacterial isolates recovered from *Fusarium* root rot-endemic and non-endemic cassava agroecosystems

| **Upland** | | | |
| --- | --- | --- | --- |
| **Isolate** | **PI** | **Isolate** | **PI** |
| *Bacillus aerophilus*ULB_53 | 49.26 ± 0.64efg | *Variovorax guangxiensis*3ULB_62 | 24.44 ± 1.92stu |
| *Pseudomonas sp*.2ULB_66 | 49.26 ± 1.28efg | *Enterobacter sp*.1ULB_4 | 24.07 ± 2.31tuv |
| *Bacillus stercoris*ULB_12 | 47.78 ± 1.92fgh | *Klebsiella aerogenes*4ULB_54 | 22.22 ± 0.00uvw |
| *Staphylococcus arlettae*ULB_24 | 47.41 ± 3.21gh | *Enterobacter sp*.5ULB_55 | 21.48 ± 1.28vw |
| *Burkholderia sp*.ULB_22 | 45.93 ± 1.70hi | *Staphylococcus saprophyticus*ULB_26 | 21.48 ± 1.28vw |
| *Ensifer sp*.ULB_27 | 45.93 ± 0.64hi | *Salmonella sp*.ULB_29 | 21.11 ± 1.92w |
| *Pseudomonas nicosulfuronedens*ULB_8 | 44.07 ± 0.64ij | *Enterobacter cloacae*1ULB_16 | 20.74 ± 1.70wx |
| *Stenotrophomonas sp*.ULB_18 | 44.07 ± 1.70ij | *Enterobacter sp*.4ULB_52 | 20.37 ± 1.70wxy |
| *Bacillaceae* bacteriumULB_3 | 43.70 ± 1.28ij | *Klebsiella sp*.3ULB_35 | 20.37 ± 0.64wxy |
| *Rhizobium dioscoreae*1ULB_45 | 41.48 ± 1.28jk | *Citrobacter freundii*ULB_58 | 18.15 ± 1.28xyz |
| *Cytobacillus firmus*ULB_2 | 40.74 ± 2.80k | *Variovorax guangxiensis*2ULB_47 | 18.15 ± 0.64xyz |
| *Klebsiella aerogenes*1ULB_11 | 40.74 ± 1.70k | *Enterobacter cloacae*3ULB_40 | 17.78 ± 1.92yz |
| *Rhizobium dioscoreae*2ULB_64 | 39.26 ± 3.39kl | *Enterobacter cloacae*2ULB_38 | 17.41 ± 1.28zA |
| *Lysinibacillus sp*.ULB_48 | 36.67 ± 2.22lm | *Citrobacter werkmanii*ULB_10 | 17.04 ± 0.64zA |
| *Burkholderia cenocepacia*ULB_43 | 35.56 ± 1.92mn | *Klebsiella aerogenes*2ULB_37 | 17.04 ± 0.64zA |
| *Cytobacillus kochii*ULB_9 | 33.70 ± 1.28no | *Klebsiella sp*.1ULB_30 | 17.04 ± 0.64zA |
| *Staphylococcus warneri*ULB_21 | 33.33 ± 2.22nop | *Klebsiella sp*.2ULB_34 | 16.67 ± 0.00zA |
| *Kytococcus sedentarius*ULB_23 | 31.11 ± 2.94opq | *Neobacillus drentensis*ULB_14 | 16.67 ± 0.00zA |
| *Ralstonia soli*ULB_44 | 30.74 ± 2.31pq | *Enterobacter sp*.3ULB_41 | 16.30 ± 0.64zAB |
| *Staphylococcus hominis*ULB_15 | 30.37 ± 1.28q | *Variovorax guangxiensis*1ULB_46 | 14.81 ± 0.64AB |
| *Sutcliffiella sp*.ULB_1 | 30.37 ± 2.80q | *Klebsiella aerogenes*3ULB_39 | 13.70 ± 2.31BC |
| *Kluyvera sp*.ULB_6 | 28.52 ± 1.28qr | *Enterobacter pseudoroggenkampii*ULB_61 | 11.85 ± 1.28C |
| *Cupriavidus sp*.ULB_19 | 27.04 ± 1.28rs | *Kluyvera cryocrescens*ULB_57 | 11.11 ± 0.00CD |
| *Chitinophaga sp*.ULB_65 | 25.93 ± 1.28rst | *Enterobacter sp*.2ULB_31 | 8.52 ± 1.70D |
| **Wetland diseased** | | | |
| *Bacillus sp*.WDB_25 | 45.56 ± 1.11e | *Acinetobacter pittii*WDB_13 | 25.93 ± 1.28rs |
| *Kosakonia* *oryzendophytica*2WDB_62 | 45.56 ± 1.92e | *Enterobacter sp*.2WDB_15 | 25.93 ± 1.70rs |
| *Aeromonas sp*.2WDB_34 | 44.07 ± 1.70e | *Enterobacter sp*.1WDB_3 | 24.07 ± 0.64jk |
| *Acinetobacter* *nosocomialis*1WDB_27 | 41.11 ± 2.22f | *Klebsiella aerogenes*2WDB_10 | 24.07 ± 0.64st |
| *Acinetobacter* *nosocomialis*2WDB_28 | 40.74 ± 3.21fg | *Citrobacter farmeri*1WDB_17 | 23.33 ± 1.11tu |
| *Enterobacter sp*.3WDB_24 | 39.63 ± 2.31fgh | *Klebsiella aerogenes*4WDB_37 | 23.33 ± 1.11tu |
| *Aeromonas hydrophila*WDB_72 | 38.52 ± 0.64ghi | *Phytobacter diazotrophicus*2WDB_38 | 23.33 ± 0.00tu |
| *Kosakonia* *oryzendophytica*3WDB_66 | 38.15 ± 0.64hi | *Enterobacter sp*.7WDB_46 | 22.96 ± 0.64tu |
| *Phytobacter diazotrophicus*1WDB_30 | 37.04 ± 2.57ij | *Enterobacter chengduensis*1WDB_7 | 22.59 ± 0.64tu |
| *Enterobacter sp*.10WDB_65 | 35.56 ± 2.94st | *Kosakonia oryzendophytica*4WDB_77 | 22.22 ± 1.92tuv |
| *Kosakonia* *oryzendophytica*1WDB_55 | 35.56 ± 0.00jk | *Kosakonia pseudosacchari*5WDB_82 | 22.22 ± 1.92tuv |
| *Pantoea dispersa*WDB_79 | 33.70 ± 0.64kl | *Enterobacter soli*2WDB_45 | 22.22 ± 1.11tuv |
| *Enterobacter hormaechei*3WDB_26 | 33.33 ± 2.22kl | *Chryseobacterium sp*.3WDB_73 | 22.22 ± 0.00tuv |
| *Enterobacter kobei*WDB_23 | 32.96 ± 1.28l | *Kluyvera sp*.1WDB_63 | 22.22 ± 0.00tuv |
| *Kosakonia pseudosacchari*2WDB_60 | 32.96 ± 0.64l | *Kosakonia pseudosacchari*3WDB_61 | 22.22 ± 0.00tuv |
| *Enterobacter soli*4WDB_80 | 32.22 ± 1.11lm | *Stenotrophomonas sp*.WDB_31 | 22.22 ± 0.00tuv |
| *Enterobacter sp*.9 WDB_64 | 30.37 ± 2.57mn | *Enterobacter sp*.6WDB_43 | 21.85 ± 1.70tuv |
| *Kosakonia pseudosacchari*1WDB_57 | 30.00 ± 1.11mno | *Enterobacter chengduensis*2WDB_21 | 21.48 ± 0.64uv |
| *Enterobacter soli*1WDB_33 | 28.89 ± 1.92nop | *Kosakonia sp*.3WDB_58 | 21.48 ± 1.70uv |
| *Enterobacter sp*.11WDB_67 | 28.89 ± 1.92nop | *Enterobacter sp*.8WDB_59 | 21.48 ± 1.28uv |
| *Kosakonia pseudosacchari*4WDB_78 | 28.89 ± 1.92nop | *Enterobacter soli*3WDB_48 | 21.11 ± 1.11uv |
| *Acinetobacter sp*.WDB_75 | 28.52 ± 1.28nopq | *Kluyvera sp*.2WDB_81 | 20.00 ± 1.92vw |
| *Aeromonas media*WDB_36 | 28.52 ± 1.28nopq | *Klebsiella variicola*2WDB_52 | 20.00 ± 1.92vw |
| *Klebsiella sp*. WDB_83 | 28.52 ± 1.28nopq | *Aeromonas sp*.1WDB_29 | 18.52 ± 1.70wx |
| *Enterobacter hormaechei*1WDB_1 | 28.52 ± 0.64nopq | *Enterobacter sichuanensis*WDB_50 | 17.41 ± 1.28xy |
| *Klebsiella variicola*1WDB_39 | 28.52 ± 0.64nopq | *Kluyvera georgiana*WDB_54 | 17.41 ± 1.28xy |
| *Citrobacter amalonaticus*WDB_44 | 28.15 ± 1.28nopqr | *Enterobacter cloacae* WDB_56 | 16.67 ± 0.00xyz |
| *Enterobacter sp*.5 WDB_42 | 27.78 ± 0.00opqr | *Enterobacter sp*. 12WDB_68 | 16.67 ± 2.22xyz |
| *Klebsiella aerogenes*1WDB_5 | 27.78 ± 1.11opqr | *Klebsiella quasivariicola*2WDB_74 | 16.67 ± 1.92xyz |
| *Klebsiella quasivariicola*1WDB_32 | 27.78 ± 1.11opqr | *Kosakonia sp*.2WDB_47 | 15.19 ± 2.57yz |
| *Enterobacter hormaechei*2WDB_16 | 27.41 ± 0.64pqr | *Kosakonia sp*.1WDB_41 | 14.81 ± 2.31z |
| *Enterobacter sp*.4WDB_35 | 27.41 ± 1.28pqr | *Chryseobacterium sp*.2WDB_70 | 14.81 ± 1.70z |
| *Citrobacter farmeri*2WDB_49 | 26.67 ± 1.92pqr | *Citrobacter sp*.WDB_2 | 11.85 ± 1.28A |
| *Klebsiella aerogenes*3WDB_18 | 26.67 ± 0.00pqr | *Chryseobacterium sp*.1WDB_69 | 7.04 ± 1.28B |
| *Klebsiella quasivariicola*3WDB_76 | 26.30 ± 1.28qrs |  |  |
| **Wetland healthy** | | | |
| *Kluyvera georgiana*WHB_43 | 49.63 ± 2.31de | *Enterobacter sp*.16WHB_69 | 31.48 ± 1.70opqr |
| *Niallia sp*.2WHB_20 | 49.63 ± 1.28de | *Acinetobacter pittii*WHB_26 | 31.11 ± 1.92pqrs |
| *Kosakonia sp*.5WHB_44 | 49.63 ± 0.64de | *Enterobacter sp*.3WHB_10 | 30.74 ± 2.31pqrst |
| *Priestia sp*.2WHB_16 | 49.63 ± 0.64de | *Enterobacter sp*.6WHB_40 | 30.74 ± 1.70pqrst |
| *Leclercia sp*.WHB_29 | 47.41 ± 1.28ef | *Kosakonia sp*.3WHB_30 | 30.37 ± 0.64qrstu |
| *Falsibacillus sp*.WHB_17 | 46.67 ± 1.92f | *Enterobacter sp*.13WHB_60 | 29.26 ± 1.70rstuv |
| *Novosphingobium* *panipatense*WHB_38 | 46.30 ± 0.64f | *Enterobacter sp*.9WHB_49 | 28.89 ± 1.92stuvw |
| *Klebsiella aerogenes*WHB_32 | 45.93 ± 1.70f | *Klebsiella sp*.3WHB_57 | 28.89 ± 1.11stuvw |
| *Niallia sp*.1WHB_12 | 45.56 ± 1.92fg | *Kluyvera sp*.2WHB_27 | 28.52 ± 0.64tuvwx |
| *Kluyvera sp*.3WHB_47 | 45.19 ± 2.31fgh | *Kluyvera sp*.1WHB_22 | 28.15 ± 1.28uvwx |
| *Kosakonia pseudosacchari*WHB_45 | 43.33 ± 1.11ghi | *Enterobacter sp*.8WHB_48 | 27.78 ± 0.00vwxy |
| *Cytobacillus oceanisediminis*2WHB_9 | 42.96 ± 1.70hij | *Enterobacter sp*.2WHB_7 | 26.67 ± 1.11wxyz |
| *Enterobacter huaxiensis*3WHB_46 | 42.96 ± 2.31hij | *Kosakonia sp*.7WHB_75 | 26.30 ± 0.64xyz |
| *Cytobacillus* *oceanisediminis*1WHB_3 | 42.59 ± 1.70ij | *Klebsiella sp*.6WHB_66 | 25.56 ± 1.92yzA |
| *Niallia sp*.3WHB_79 | 42.59 ± 1.70ij | *Enterobacter huaxiensis*2WHB_42 | 24.44 ± 1.92zAB |
| *Kosakonia sp*.4WHB_33 | 42.22 ± 1.11ij | *Pseudomonas* *wayambapalatensis*WHB_82 | 23.70 ± 1.70AB |
| *Pseudomonas sp*.2WHB_85 | 41.11 ± 1.92ijk | *Enterobacter sp*.1WHB_1 | 22.59 ± 0.64BC |
| *Acinetobacter pittii*WHB_6 | 40.74 ± 3.21jk | *Klebsiella sp*.1WHB_15 | 22.59 ± 0.64BC |
| *Leclercia tamurae*WHB_36 | 40.74 ± 1.70jk | *Klebsiella sp*.5WHB_64 | 22.59 ± 0.64BC |
| *Enterobacter sp*.15WHB_68 | 39.63 ± 3.21k | *Klebsiella sp*.7WHB_72 | 22.22 ± 0.00BCD |
| *Enterobacter sp*.17WHB_71 | 39.26 ± 2.57kl | *Enterobacter sp*.18WHB_74 | 20.37 ± 2.31CDE |
| *Enterobacter sp*.5WHB_31 | 39.26 ± 1.70kl | *Enterobacter sp*.14WHB_61 | 20.00 ± 1.92DEF |
| *Epilithonimonas* *arachidiradicis*WHB_34 | 37.04 ± 1.70lm | *Kosakonia sp*.2WHB_25 | 18.52 ± 1.70EFG |
| *Enterobacter sp*.7WHB_41 | 35.19 ± 2.31mn | *Enterobacter sp*.10WHB_53 | 17.78 ± 1.92FG |
| *Enterobacter huaxiensis*1WHB_28 | 33.70 ± 0.64no | *Enterobacter sp*.4WHB_23 | 17.41 ± 1.28G |
| *Kosakonia sp*.6WHB_50 | 32.96 ± 0.64nop | *Klebsiella sp*.4WHB_59 | 17.41 ± 1.28G |
| *Pseudomonas kurunegalensis*WHB_39 | 32.96 ± 0.64nop | *Enterobacter sp*.11WHB_54 | 17.04 ± 1.28G |
| *Citrobacter sp*.WHB_24 | 32.59 ± 0.64opq | *Enterobacter sp*.12WHB_56 | 14.07 ± 2.80H |
| *Klebsiella sp*.2WHB_18 | 31.85 ± 1.28opq | *Priestia sp*.1WHB_14 | 7.41 ± 1.70I |

Values represent percent inhibition (PI, mean ± SD; n = 3). Different lowercase letters within each habitat indicate significant differences among isolates according to ANOVA

**Supplementary Table 4.** Cumulative *in vitro* antifungal activity of rhizoplane bacterial isolates from upland (ULB), wetland diseased (WDB), and wetland healthy (WHB) habitats against *Fusarium falciforme* by dual culture assay and volatile assay

| **Rhizoplane Bacterial Isolate** | **DC-PI** | **VI-PI** | **Average** | **Rhizoplane Bacterial Isolate** | **DC-PI** | **VI-PI** | **Average** |
| --- | --- | --- | --- | --- | --- | --- | --- |
| *Bacillus subtilis*ULB_36 | 83.33 | 55.56 | 69.44 | *Priestia sp*.1WHB_14 | 52.22 | 7.41 | 29.81 |
| *Bacillus stercoris*ULB_12 | 78.52 | 47.78 | 63.15 | *Niallia sp*.2WHB_20 | 9.63 | 49.63 | 29.63 |
| *Klebsiella pneumoniae*WHB_81 | 54.81 | 64.44 | 59.63 | *Stutzerimonas stutzeri*WDB_11 | 5.19 | 53.70 | 29.45 |
| *Pseudomonas aeruginosa*ULB_13 | 61.48 | 51.48 | 56.48 | *Klebsiella quasivariicola*2WDB_74 | 42.22 | 16.67 | 29.44 |
| *Bacillus pumilus*ULB_25 | 59.26 | 52.59 | 55.93 | *Enterobacter cloacae*1ULB_16 | 37.78 | 20.74 | 29.26 |
| *Pseudomonas sp*.1ULB_33 | 52.59 | 58.52 | 55.55 | *Stenotrophomonas sp*.1WHB_2 | 2.22 | 56.30 | 29.26 |
| *Kosakonia pseudosacchari*WHB_4 | 55.56 | 54.81 | 55.19 | *Klebsiella sp*.1WHB_15 | 35.56 | 22.59 | 29.08 |
| *Bacillus aerophilus*ULB_53 | 59.26 | 49.26 | 54.26 | *Enterobacter sp*.11WHB_54 | 41.11 | 17.04 | 29.07 |
| *Pseudomonas knackmussii*WDB_84 | 44.44 | 61.85 | 53.15 | *Enterobacter sp*.18WHB_74 | 37.41 | 20.37 | 28.89 |
| *Acinetobacter pittii*WHB_6 | 60.37 | 40.74 | 50.56 | *Staphylococcus arlettae*ULB_24 | 10 | 47.41 | 28.70 |
| *Stenotrophomonas maltophilia*WHB_8 | 44.44 | 54.81 | 49.63 | *Kosakonia sp*.2WDB_47 | 42.22 | 15.19 | 28.70 |
| *Bacillus sp*.WDB_25 | 52.96 | 45.56 | 49.26 | *Enterobacter huaxiensis*3WHB_46 | 14.44 | 42.96 | 28.70 |
| *Burkholderia sp.*ULB_22 | 50.74 | 45.93 | 48.33 | *Enterobacter sp*.5ULB_55 | 35.56 | 21.48 | 28.52 |
| *Pantoea dispersa1* WHB_55 | 40 | 55.19 | 47.59 | *Novosphingobium panipatense*WHB_38 | 10.74 | 46.30 | 28.52 |
| *Stenotrophomonas sp*.ULB_18 | 51.11 | 44.07 | 47.59 | *Enterobacter sp*.10WHB_53 | 38.89 | 17.78 | 28.33 |
| *Pantoea dispersa*2WHB_67 | 44.81 | 50.00 | 47.41 | *Kluyvera sp*.ULB_6 | 27.78 | 28.52 | 28.15 |
| *Kosakonia sp*.5WHB_44 | 42.22 | 49.63 | 45.92 | *Kosakonia sp*.2WHB_25 | 37.78 | 18.52 | 28.15 |
| *Priestia aryabhattai*ULB_17 | 41.11 | 50.37 | 45.74 | *Cytobacillus kochii*WDB_12 | 5.19 | 50.74 | 27.97 |
| *Rhizobium dioscoreae*1ULB_45 | 48.15 | 41.48 | 44.82 | *Pseudomonas oleovorans*WDB_71 | 5.93 | 50.00 | 27.97 |
| *Kosakonia oryzendophytica*2WDB_62 | 44.07 | 45.56 | 44.81 | *Enterobacter sichuanensis*WDB_50 | 38.15 | 17.41 | 27.78 |
| *Niallia sp*.3WHB_79 | 46.67 | 42.59 | 44.63 | *Leclercia sp*.WHB_29 | 8.15 | 47.41 | 27.78 |
| *Burkholderia cenocepacia*ULB_43 | 52.59 | 35.56 | 44.07 | *Epilithonimonas arachidiradicis*WHB_34 | 18.52 | 37.04 | 27.78 |
| *Kosakonia sp*.7WHB_75 | 60 | 26.30 | 43.15 | *Ensifer sp*.ULB_27 | 9.63 | 45.93 | 27.78 |
| *Kluyvera sp*.3WHB_47 | 41.11 | 45.19 | 43.15 | *Klebsiella variicola*2WDB_52 | 35.19 | 20.00 | 27.60 |
| *Priestia sp*.2WHB_16 | 35.56 | 49.63 | 42.59 | *Enterobacter sp*.3ULB_41 | 38.89 | 16.30 | 27.59 |
| *Kosakonia sp*.4WHB_33 | 42.22 | 42.22 | 42.22 | *Aeromonas sp*.2WDB_34 | 11.11 | 44.07 | 27.59 |
| *Kosakonia oryzendophytica*3WDB_66 | 44.44 | 38.15 | 41.29 | *Enterobacter huaxiensis*1WHB_28 | 21.48 | 33.70 | 27.59 |
| *Rhizobium dioscoreae*2ULB_64 | 42.59 | 39.26 | 40.92 | *Enterobacter cloacae*3ULB_40 | 37.04 | 17.78 | 27.41 |
| *Niallia circulans*ULB_7 | 11.11 | 69.63 | 40.37 | *Bacillaceae bacterium*ULB_3 | 11.11 | 43.70 | 27.41 |
| *Kosakonia oryzendophytica* 1WDB_55 | 44.07 | 35.56 | 39.81 | *Klebsiella aerogenes*2ULB_37 | 37.41 | 17.04 | 27.22 |
| *Enterobacter sp*.17WHB_71 | 40 | 39.26 | 39.63 | *Klebsiella sp*.1ULB_30 | 37.41 | 17.04 | 27.22 |
| *Aeromonas hydrophila*WDB_72 | 40.74 | 38.52 | 39.63 | *Enterobacter sp*.12WHB_56 | 40.37 | 14.07 | 27.22 |
| *Kosakonia pseudosacchari*WHB_45 | 35.56 | 43.33 | 39.45 | *Cytobacillus firmus*ULB_2 | 12.22 | 40.74 | 26.48 |
| *Enterobacter sp*.5WHB_31 | 39.63 | 39.26 | 39.44 | *Staphylococcus hominis*ULB_15 | 22.59 | 30.37 | 26.48 |
| *Kosakonia pseudosacchari*4WDB_78 | 50 | 28.89 | 39.44 | *Staphylococcus warneri*ULB_21 | 19.26 | 33.33 | 26.30 |
| *Klebsiella sp*.3WHB_57 | 50 | 28.89 | 39.44 | *Falsibacillus sp*.WHB_17 | 5.56 | 46.67 | 26.11 |
| *Kosakonia pseudosacchari*2WDB_60 | 44.44 | 32.96 | 38.70 | *Niallia sp*.1WHB_12 | 5.93 | 45.56 | 25.74 |
| *Pantoea dispersa*WDB_79 | 43.33 | 33.70 | 38.52 | *Cytobacillus oceanisediminis*2WHB_9 | 8.52 | 42.96 | 25.74 |
| *Acinetobacter nosocomialis*2WDB_28 | 35.93 | 40.74 | 38.34 | *Klebsiella aerogenes*1WDB_5 | 22.59 | 27.78 | 25.18 |
| *Kosakonia sp*.3WHB_30 | 45.93 | 30.37 | 38.15 | *Pseudomonas sp*.2WHB_85 | 8.89 | 41.11 | 25.00 |
| *Kosakonia sp*.6WHB_50 | 43.33 | 32.96 | 38.15 | *Enterobacter hormaechei*1WDB_1 | 19.63 | 28.52 | 24.07 |
| *Enterobacter sp*.15WHB_68 | 36.3 | 39.63 | 37.96 | *Enterobacter sp*.9WHB_49 | 18.89 | 28.89 | 23.89 |
| *Klebsiella aerogenes*1ULB_11 | 34.81 | 40.74 | 37.78 | *Citrobacter sp*.WHB_24 | 14.81 | 32.59 | 23.70 |
| *Enterobacter sp*.10WDB_65 | 39.26 | 35.56 | 37.41 | *Kluyvera sp*.1WHB_22 | 18.52 | 28.15 | 23.33 |
| *Enterobacter sp*.7WHB_41 | 39.26 | 35.19 | 37.22 | *Kluyvera georgiana*WDB_54 | 28.89 | 17.41 | 23.15 |
| *Phytobacter diazotrophicus*1WDB_30 | 37.04 | 37.04 | 37.04 | *Cytobacillus oceanisediminis*1WHB_3 | 2.22 | 42.59 | 22.41 |
| *Kosakonia pseudosacchari*1WDB_57 | 44.07 | 30.00 | 37.04 | *Kluyvera cryocrescens*ULB_57 | 33.7 | 11.11 | 22.41 |
| *Klebsiella sp*.WDB_83 | 45.19 | 28.52 | 36.85 | *Enterobacter sp*.6WHB_40 | 13.33 | 30.74 | 22.04 |
| *Enterobacter sp*.16WHB_69 | 41.85 | 31.48 | 36.67 | Klebsiella aerogenes4WDB_37 | 19.63 | 23.33 | 21.48 |
| *Aeromonas media*WDB_36 | 44.44 | 28.52 | 36.48 | *Klebsiella aerogenes*4ULB_54 | 20.74 | 22.22 | 21.48 |
| *Klebsiella sp*.5WHB_64 | 50 | 22.59 | 36.30 | *Enterobacter sp*.4WHB_23 | 25.19 | 17.41 | 21.30 |
| *Kosakonia sp*.3WDB_58 | 51.11 | 21.48 | 36.30 | *Enterobacter sp*.7WDB_46 | 19.63 | 22.96 | 21.30 |
| *Stenotrophomonas sp*.WDB_31 | 50 | 22.22 | 36.11 | *Acinetobacter nosocomialis*1WDB_27 | 1.48 | 41.11 | 21.30 |
| *Enterobacter sp*.9WDB_64 | 41.48 | 30.37 | 35.93 | *Pseudomonas kurunegalensis*WHB_39 | 8.89 | 32.96 | 20.93 |
| *Lysinibacillus sp*.ULB_48 | 34.81 | 36.67 | 35.74 | *Ralstonia soli*ULB_44 | 11.11 | 30.74 | 20.93 |
| *Kosakonia pseudosacchari*5WDB_82 | 48.89 | 22.22 | 35.56 | *Citrobacter sp*.WDB_2 | 29.63 | 11.85 | 20.74 |
| *Enterobacter sp*.13WHB_60 | 41.48 | 29.26 | 35.37 | *Sutcliffiella sp*.ULB_1 | 11.11 | 30.37 | 20.74 |
| *Klebsiella quasivariicola*3WDB_76 | 44.44 | 26.30 | 35.37 | *Enterobacter sp*.3WDB_24 | 1.85 | 39.63 | 20.74 |
| *Chitinophaga sp*.ULB_65 | 44.81 | 25.93 | 35.37 | *Kluyvera sp*.2WHB_27 | 12.96 | 28.52 | 20.74 |
| *Cytobacillus oceanisediminis*3WHB_35 | 15.93 | 54.07 | 35.00 | *Acinetobacter pittii*WHB_26 | 9.63 | 31.11 | 20.37 |
| *Phytobacter diazotrophicus*2WDB_38 | 46.67 | 23.33 | 35.00 | *Enterobacter sp*.8WHB_48 | 12.96 | 27.78 | 20.37 |
| *Pseudomonas sp*.1WHB_83 | 9.26 | 60.37 | 34.82 | *Enterobacter hormaechei*3WDB_26 | 7.04 | 33.33 | 20.19 |
| *Cytobacillus kochii*ULB_9 | 35.56 | 33.70 | 34.63 | *Enterobacter chengduens*is1WDB_7 | 17.78 | 22.59 | 20.19 |
| *Bacillus infantis*WDB_4 | 10 | 59.26 | 34.63 | *Enterobacter sp*.6WDB_43 | 18.15 | 21.85 | 20.00 |
| *Enterobacter soli*1WDB_33 | 40.37 | 28.89 | 34.63 | *Kytococcus sedentarius*ULB_23 | 8.15 | 31.11 | 19.63 |
| *Pseudomonas sp*.2ULB_66 | 19.63 | 49.26 | 34.44 | *Citrobacter freundii*ULB_58 | 21.11 | 18.15 | 19.63 |
| *Enterobacter sp*.11WDB_67 | 40 | 28.89 | 34.44 | *Enterobacter pseudoroggenkampii*ULB_61 | 26.67 | 11.85 | 19.26 |
| *Enterobacter cloacae2*ULB_38 | 50.74 | 17.41 | 34.07 | *Cupriavidus sp*.ULB_19 | 11.11 | 27.04 | 19.07 |
| *Pseudomonas wayambapalatensis*WHB_82 | 44.44 | 23.70 | 34.07 | *Enterobacter soli*4WDB_80 | 5.56 | 32.22 | 18.89 |
| *Klebsiella variicola*1WDB_39 | 39.26 | 28.52 | 33.89 | *Enterobacter sp*.2WHB_7 | 11.11 | 26.67 | 18.89 |
| *Klebsiella aerogenes*WHB_32 | 21.11 | 45.93 | 33.52 | *Enterobacter sp*.3WHB_10 | 5.93 | 30.74 | 18.34 |
| *Kluyvera sp*.1WDB_63 | 44.81 | 22.22 | 33.52 | *Variovorax guangxiensis*3ULB_62 | 12.22 | 24.44 | 18.33 |
| *Klebsiella aerogenes*3ULB_39 | 52.96 | 13.70 | 33.33 | *Enterobacter sp*.1WDB_3 | 11.11 | 24.07 | 17.59 |
| *Kosakonia pseudosacchari3*WDB_61 | 44.07 | 22.22 | 33.15 | *Chryseobacterium sp*.2WDB_70 | 19.63 | 14.81 | 17.22 |
| *Kosakonia sp*.1WDB_41 | 51.11 | 14.81 | 32.96 | *Klebsiella aerogenes*2WDB_10 | 10 | 24.07 | 17.04 |
| *Kosakonia oryzendophytica*4WDB_77 | 43.7 | 22.22 | 32.96 | *Enterobacter kobei*WDB_23 | 0.37 | 32.96 | 16.67 |
| *Klebsiella sp*.6WHB_66 | 40 | 25.56 | 32.78 | *Acinetobacter sp*.WDB_75 | 4.07 | 28.52 | 16.29 |
| *Enterobacter sp*.4ULB_52 | 44.44 | 20.37 | 32.41 | *Staphylococcus saprophyticus*ULB_26 | 10.37 | 21.48 | 15.93 |
| *Klebsiella sp*.4WHB_59 | 47.04 | 17.41 | 32.22 | *Acinetobacter pittii*WDB_13 | 5.56 | 25.93 | 15.74 |
| *Klebsiella sp*.2WHB_18 | 32.59 | 31.85 | 32.22 | *Citrobacter werkmanii*ULB_10 | 14.44 | 17.04 | 15.74 |
| *Enterobacter sp*.8WDB_59 | 42.96 | 21.48 | 32.22 | *Chryseobacterium sp*.3WDB_73 | 8.89 | 22.22 | 15.56 |
| *Enterobacter sp*.4WDB_35 | 36.67 | 27.41 | 32.04 | *Salmonella sp*.ULB_29 | 10 | 21.11 | 15.56 |
| *Pseudomonas alloputida*WHB_65 | 7.78 | 56.30 | 32.04 | *Variovorax guangxiensis*2ULB_47 | 10.74 | 18.15 | 14.44 |
| *Enterobacter sp*.5WDB_42 | 35.93 | 27.78 | 31.85 | *Variovorax guangxiensis*1ULB_46 | 13.7 | 14.81 | 14.26 |
| *Klebsiella quasivariicola1*WDB_32 | 35.56 | 27.78 | 31.67 | *Citrobacter amalonaticus*WDB_44 | 0 | 28.15 | 14.07 |
| *Enterobacter sp*.1ULB_4 | 39.26 | 24.07 | 31.67 | *Enterobacter hormaechei*2WDB_16 | 0.74 | 27.41 | 14.07 |
| *Klebsiella sp*.7WHB_72 | 41.11 | 22.22 | 31.67 | *Kluyvera sp*.2WDB_81 | 7.78 | 20.00 | 13.89 |
| *Enterobacter huaxiensis*2WHB_42 | 38.52 | 24.44 | 31.48 | *Klebsiella sp*.2ULB_34 | 11.11 | 16.67 | 13.89 |
| *Neobacillus drentensis*ULB_14 | 45.56 | 16.67 | 31.11 | *Klebsiella aerogenes*3WDB_18 | 0 | 26.67 | 13.33 |
| *Enterobacter sp*.2ULB_31 | 53.7 | 8.52 | 31.11 | *Enterobacter sp*.2WDB_15 | 0.74 | 25.93 | 13.33 |
| *Kluyvera georgiana*WHB_43 | 11.48 | 49.63 | 30.55 | *Enterobacter sp*.1WHB_1 | 2.22 | 22.59 | 12.41 |
| *Klebsiella sp*.3ULB_35 | 40 | 20.37 | 30.19 | *Citrobacter farmeri*1WDB_17 | 0.37 | 23.33 | 11.85 |
| *Pseudomonas nicosulfuronedens*ULB_8 | 15.93 | 44.07 | 30.00 | *Enterobacter chengduensis*2WDB_21 | 1.48 | 21.48 | 11.48 |
| *Enterobacter sp*.14WHB_61 | 40 | 20.00 | 30.00 | *Enterobacter soli*2WDB_45 | 0 | 22.22 | 11.11 |
| *Citrobacter farme*ri2WDB_49 | 33.33 | 26.67 | 30.00 | *Aeromonas sp*.1WDB_29 | 2.96 | 18.52 | 10.74 |
| *Enterobacter cloacae*WDB_56 | 43.33 | 16.67 | 30.00 | *Enterobacter soli*3WDB_48 | 0 | 21.11 | 10.56 |
| *Enterobacter sp*. 12WDB_68 | 43.33 | 16.67 | 30.00 | *Chryseobacterium sp*.1WDB_69 | 5.56 | 7.04 | 6.30 |
| *Leclercia tamurae*WHB_36 | 18.89 | 40.74 | 29.82 |  |  |  |  |

**Supplementary Table 5.** Efficacy of top-performing bacterial antagonists on plant growth parameters of cassava challenged with *Fusarium falciforme* under greenhouse conditions

| **Treatments** | **Plant height(cm)** | **Number of leaves** | **Shoot weight (g)** | **Sett weight (g)** | **Root weight (g)** | **Root number** | **Root length (cm)** |
| --- | --- | --- | --- | --- | --- | --- | --- |
| *Bacillus subtilis*ULB_36 + Pathogen | 71.97 ± 11.09a | 14.20 ± 1.62a | 31.87 ± 4.73a | 79.23 ± 7.70a | 2.48 ± 0.32a | 29.60 ± 4.55a | 25.90 ± 3.85a |
| *Bacillus stercoris*ULB_12+ Pathogen | 53.02 ± 32.33b | 10.40 ± 5.62b | 23.56 ± 14.28b | 57.71 ± 31.93b | 1.82 ± 1.10b | 22.00 ± 13.35b | 19.13 ± 11.60b |
| Chemical control (Carbendazim 50%WP – 0.1%) | 64.65 ± 12.59ab | 13.80 ± 2.97ab | 28.88 ± 5.55ab | 71.47 ± 7.72ab | 2.24 ± 0.39ab | 27.00 ± 5.44ab | 22.40 ± 6.06ab |
| Pathogen-inoculated control | 8.43 ± 14.93c | 2.70 ± 4.85c | 3.84 ± 6.78c | 31.48 ± 14.72c | 0.29 ± 0.52c | 3.60 ± 6.36c | 3.10 ± 5.48c |
| Absolute control | 70.58 ± 11.40a | 13.80 ± 2.35ab | 31.36 ± 5.30a | 74.19 ± 5.78a | 2.04 ± 0.16ab | 25.30 ± 2.31ab | 20.88 ± 3.08ab |
| F stat | 21** | 16** | 21** | 13** | 21** | 20** | 17** |
| p value | 0.00 | 0.00 | 0.00 | 0.00 | 0.00 | 0.00 | 0.00 |
| CD | 16.51 | 3.42 | 7.33 | 15.01 | 0.53 | 6.67 | 6.05 |
| MSE | 335.85 | 14.43 | 66.24 | 277.62 | 0.35 | 54.86 | 45.11 |
| SE(m) | 5.80 | 1.20 | 2.57 | 5.27 | 0.19 | 2.34 | 2.12 |
| SE(d) | 8.20 | 1.70 | 3.64 | 7.45 | 0.27 | 3.31 | 3.00 |
| CV (%) | 34 | 35 | 34 | 27 | 33 | 34 | 37 |
| Cohen’s F | 1.4 | 1.2 | 1.4 | 1.1 | 1.4 | 1.3 | 1.2 |

The values presented are means (± SD) of ten replicates. Values in a column with the same superscripts do not differ significantly.
