# Supplementary material
Source: Research Square preprint supplement (doi:10.21203/rs.3.rs-10099516/v1)

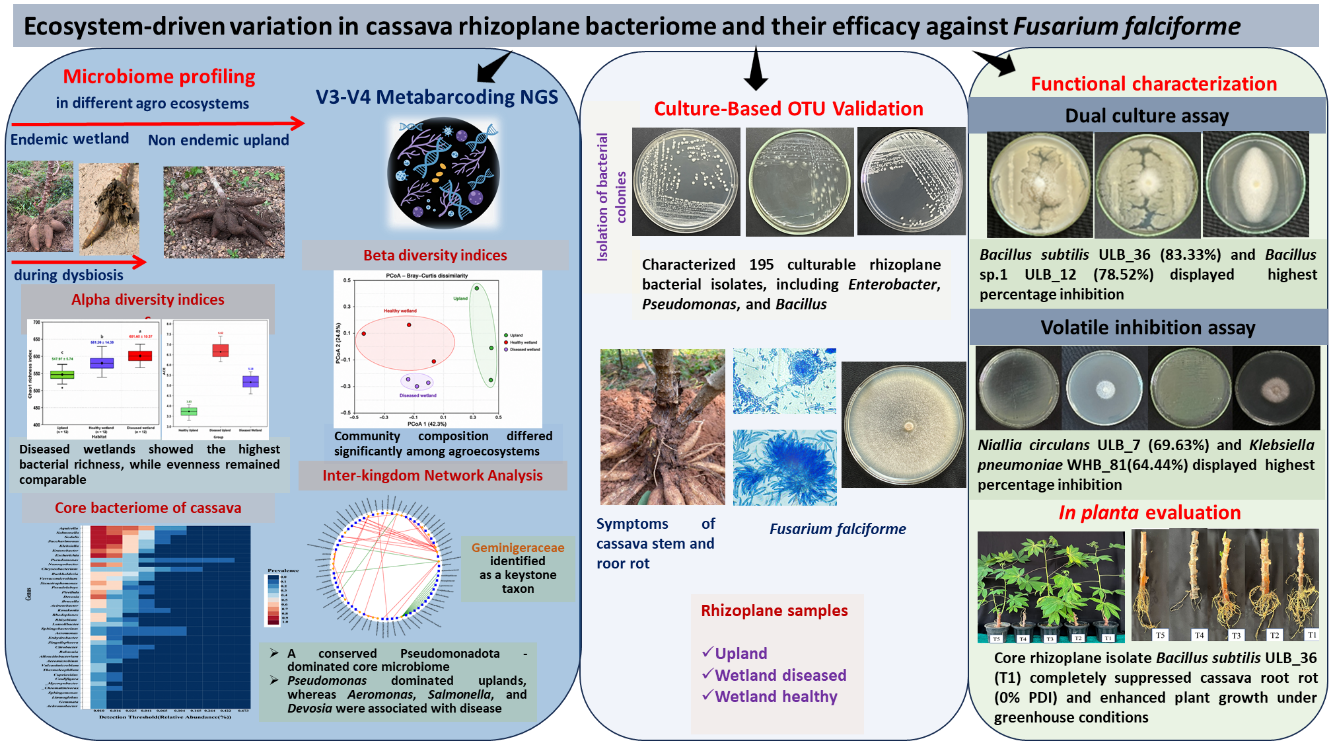


**Pictorial abstract highlighting the key results of the study**

Supplement: Supplementary file 2 [file 5d97185cf2890d80fd669ca4.docx]
